# Supplementary material for: Tripodal gold(i) polypyridyl complexes and their Cu+and Zn2+heterometallic derivatives. Effects on luminescence
Source: Royal Society of Chemistry journal article supplement (doi:10.1039/d0dt02564j), 2020-01-01
Supplement: d0dt02564j1.pdf [file d0dt02564j1.pdf]

# **Tripodal gold(I) polypyridyl complexes and their Cu<sup>+</sup> and Zn<sup>2+</sup> heterometallic derivatives. Effects on luminescence**

Andrea Pinto,<sup>a,b</sup> Giulia Spigolon,<sup>c</sup> Raquel Gavara,<sup>a</sup> Cristiano Zonta,<sup>c</sup> Giulia Licini,<sup>c,\*</sup>  
Laura Rodríguez<sup>a,b,\*</sup>

<sup>a</sup> *Departament de Química Inorgànica i Orgànica, Secció de Química Inorgànica,  
Universitat de Barcelona, Martí i Franquès 1-11, E-08028 Barcelona, Spain. e-mail:*

*laura.rodriguez@qi.ub.es*

<sup>b</sup> *Institut de Nanociència i Nanotecnologia (IN<sup>2</sup>UB). Universitat de Barcelona, 08028  
Barcelona, Spain*

<sup>c</sup> *Dipartimento di Scienze Chimiche and CIRCC, Padova Unit, Università degli Studi di  
Padova, via Marzolo 1, 35131 Padova, Italy. e-mail: giulia.licini@unipd.it*

## **Supporting Information**

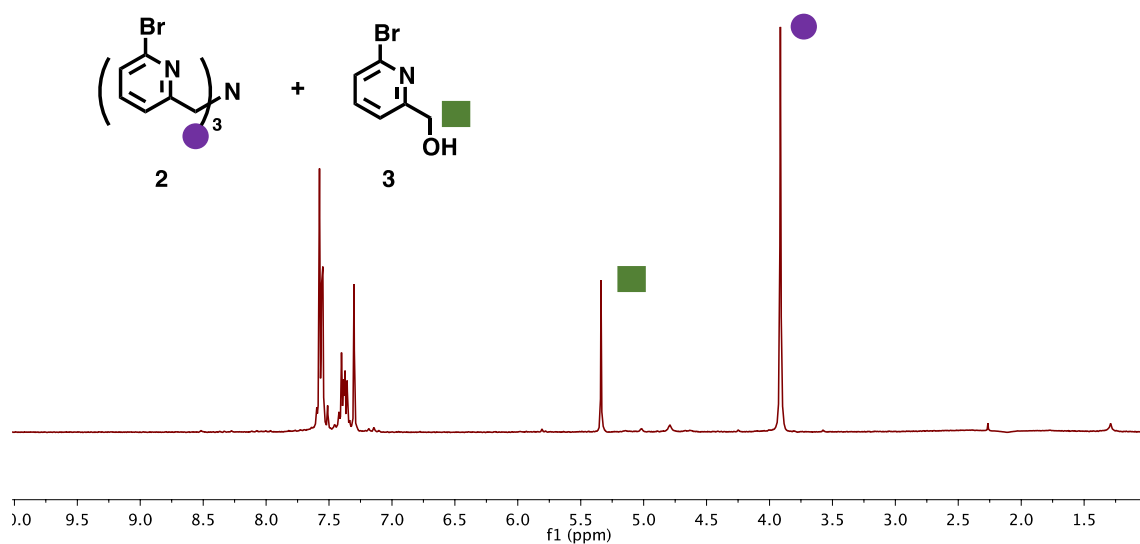

**Figure S1.** <sup>1</sup>H-NMR spectrum of the crude reaction mixture for the synthesis of L1.

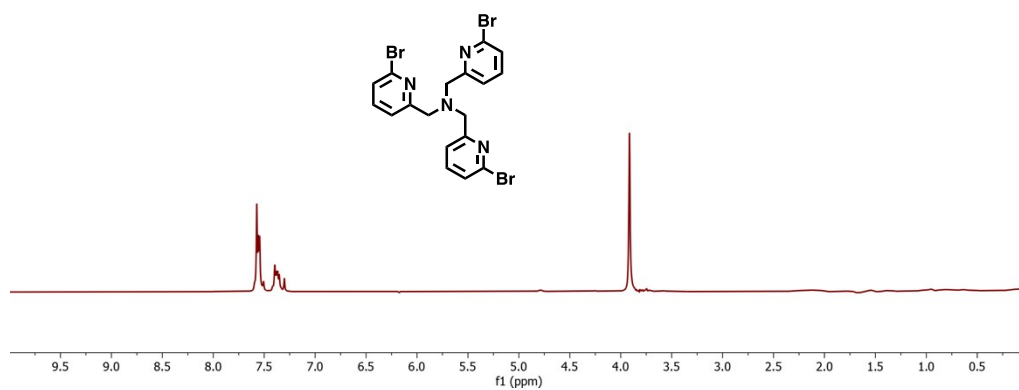

**Figure S2.** <sup>1</sup>H NMR spectrum of L1 in CDCl<sub>3</sub>.

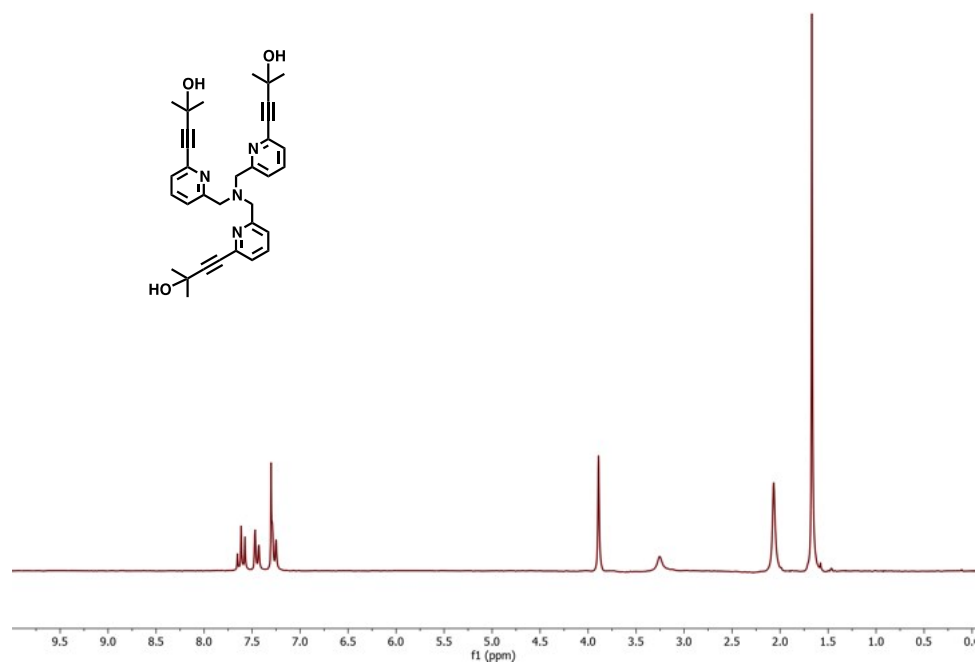

**Figure S3.** <sup>1</sup>H NMR spectrum of protected L2 in CDCl<sub>3</sub>.

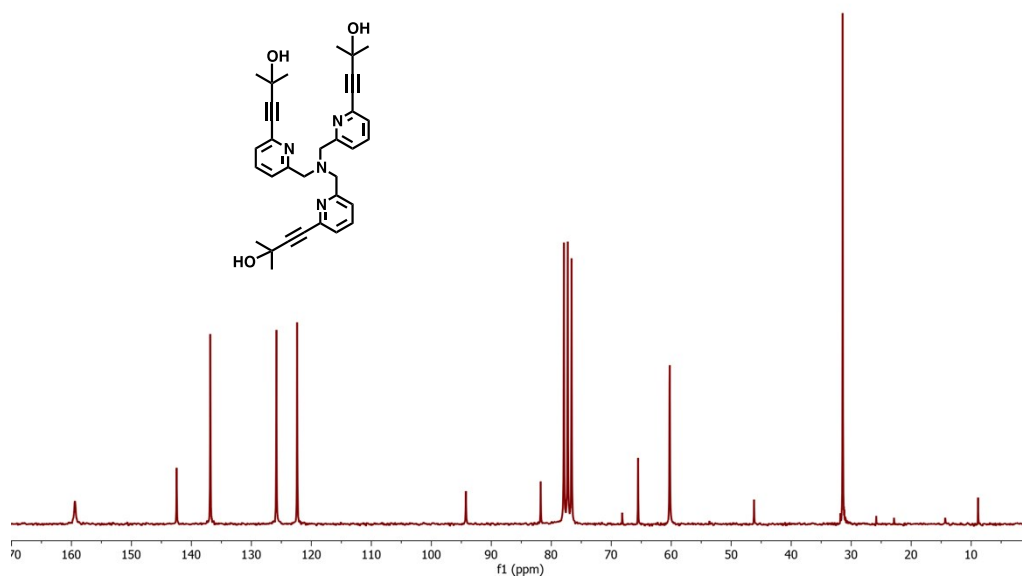

**Figure S4.** <sup>13</sup>C NMR spectrum of protected L2 in CDCl<sub>3</sub>.

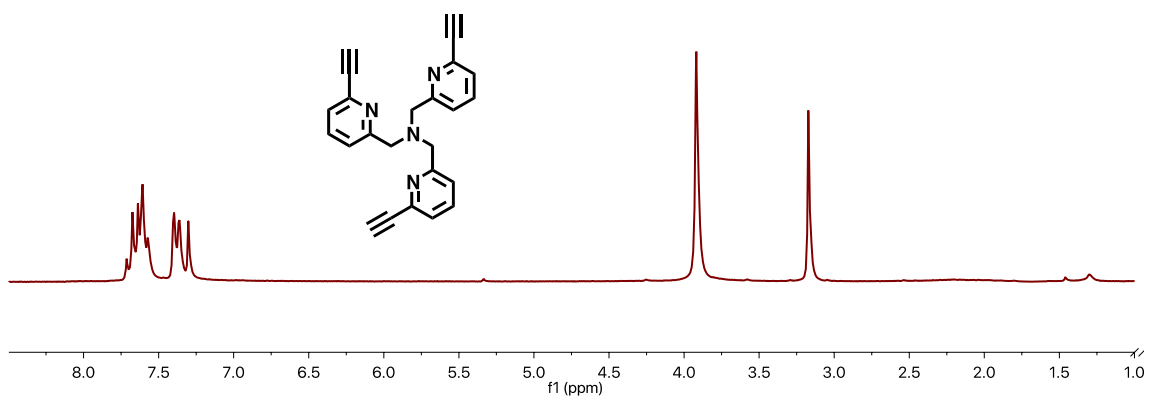

**Figure S5.**  $^1\text{H}$  NMR spectrum of **L** in  $\text{CDCl}_3$

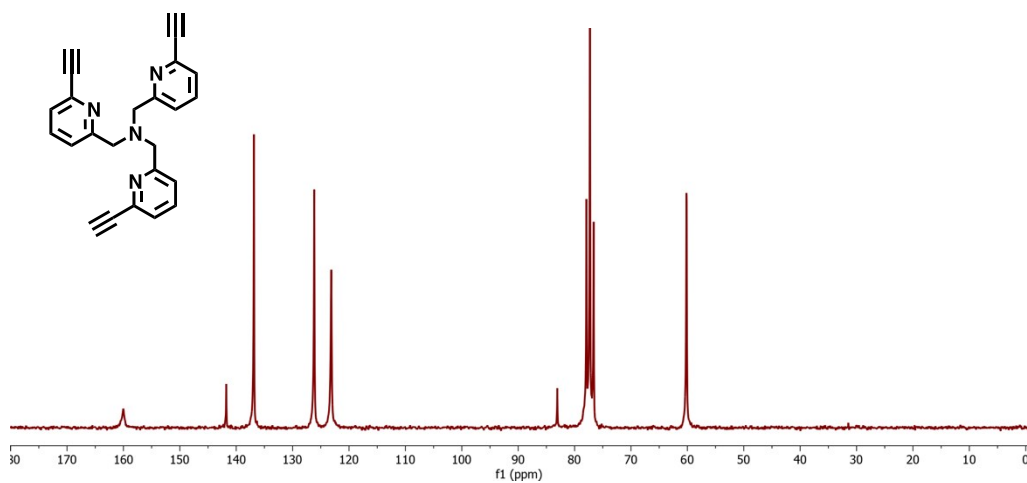

**Figure S6.**  $^{13}\text{C}$  NMR spectrum of **L** in  $\text{CDCl}_3$ .

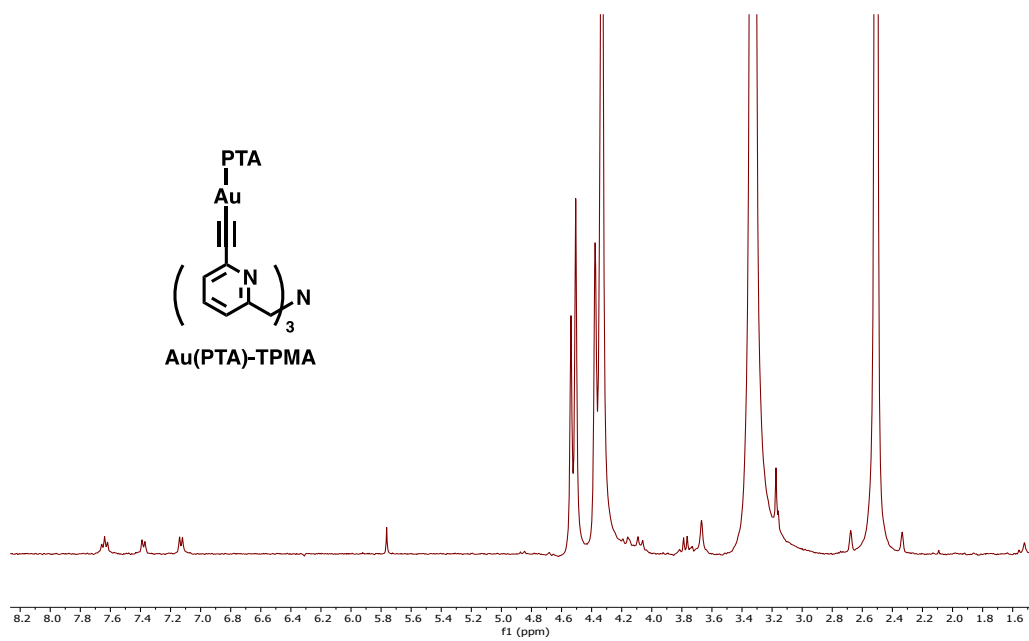

**Figure S7.**  $^1\text{H}$  NMR spectrum of **1** in  $\text{DMSO-d}_6$

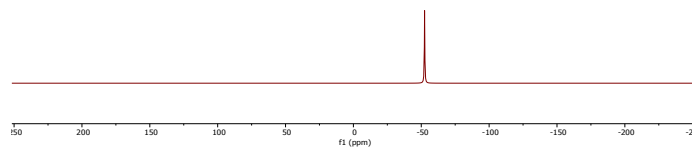

**Figure S8.**  $^{31}\text{P}$  NMR spectrum of **1** in  $\text{DMSO-d}_6$

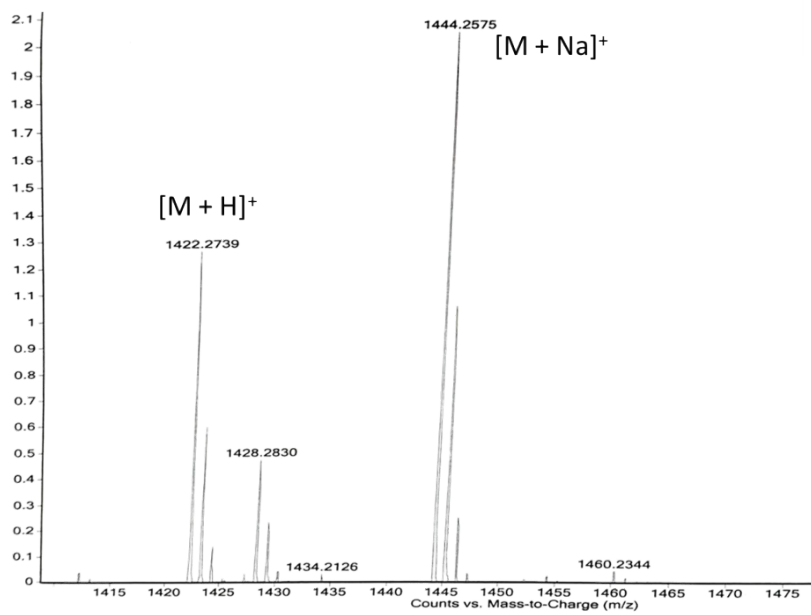

**Figure S9.** ESI-MS(+) spectrum of **1**.

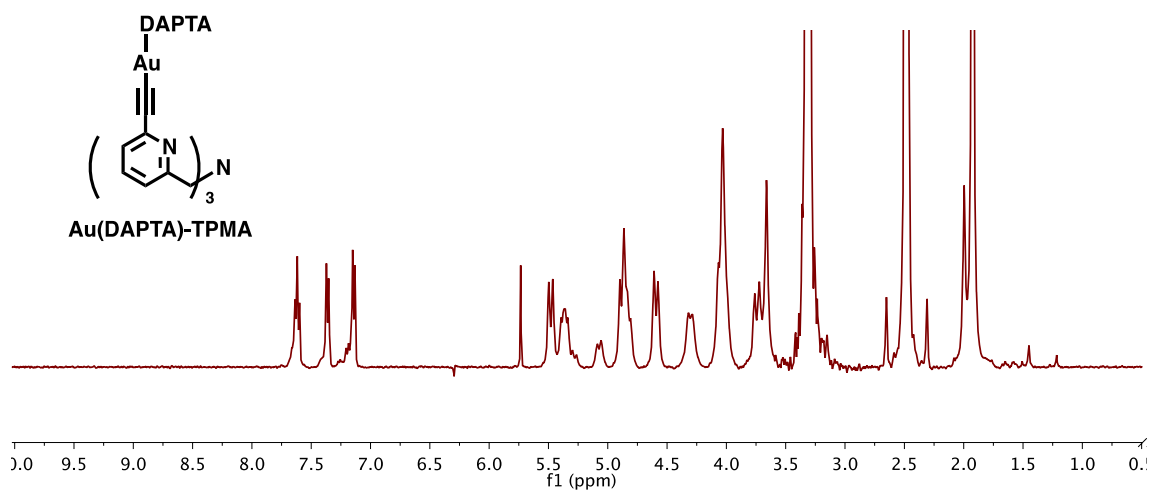

**Figure S10.**  $^1\text{H}$  NMR spectrum of **2** in  $\text{DMSO-d}_6$

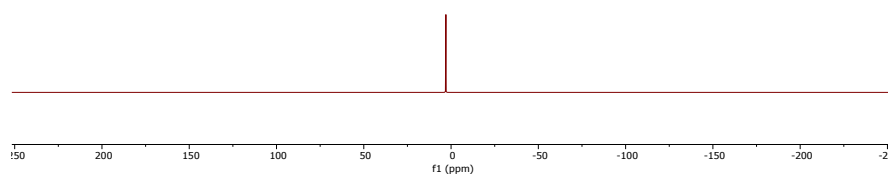

**Figure S11.**  $^{31}\text{P}$  NMR spectrum of **2** in  $\text{DMSO-d}_6$

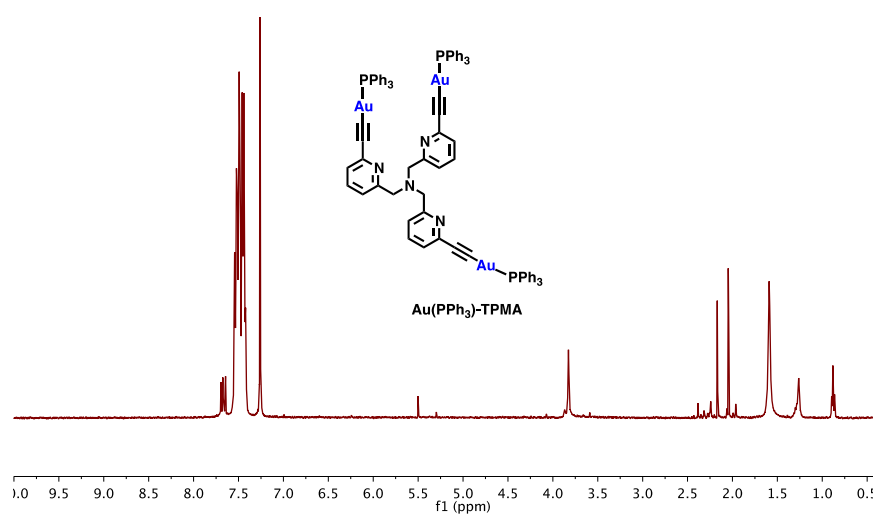

**Figure S12.**  $^1\text{H}$  NMR spectrum of **3** in  $\text{CDCl}_3$

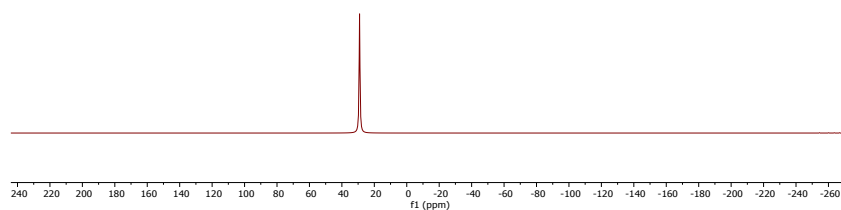

**Figure S13.**  $^{31}\text{P}$  NMR spectrum of **3** in  $\text{CDCl}_3$



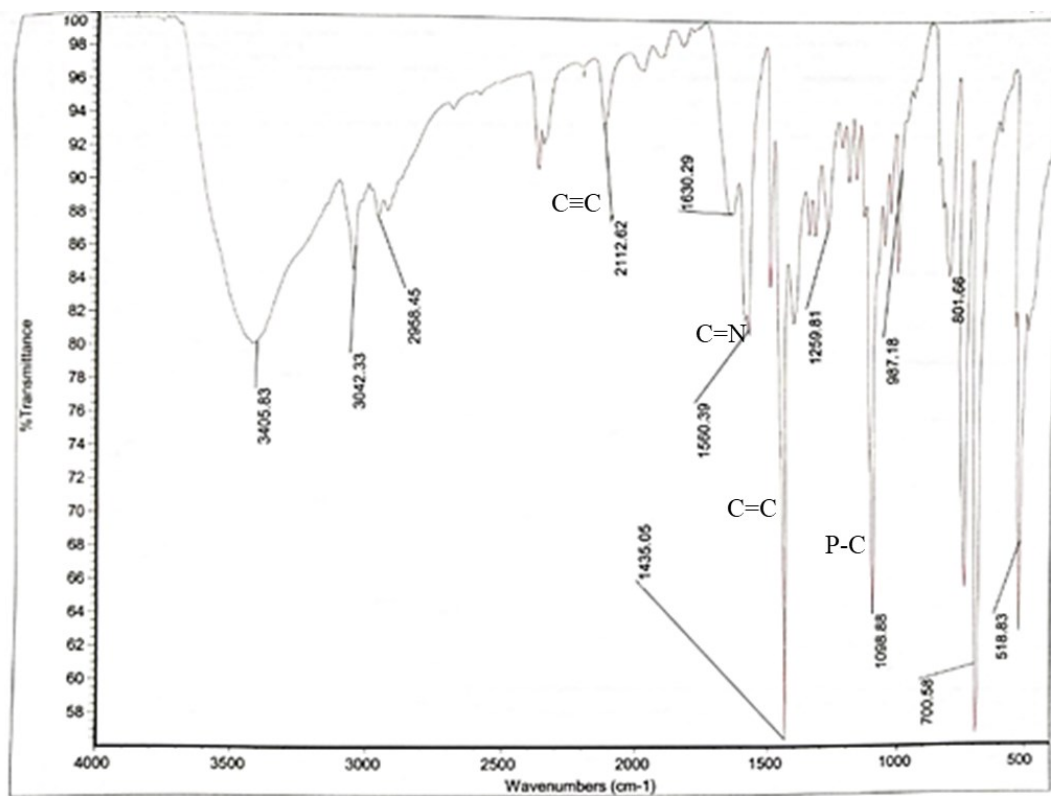

Figure S14. IR spectrum of 4.

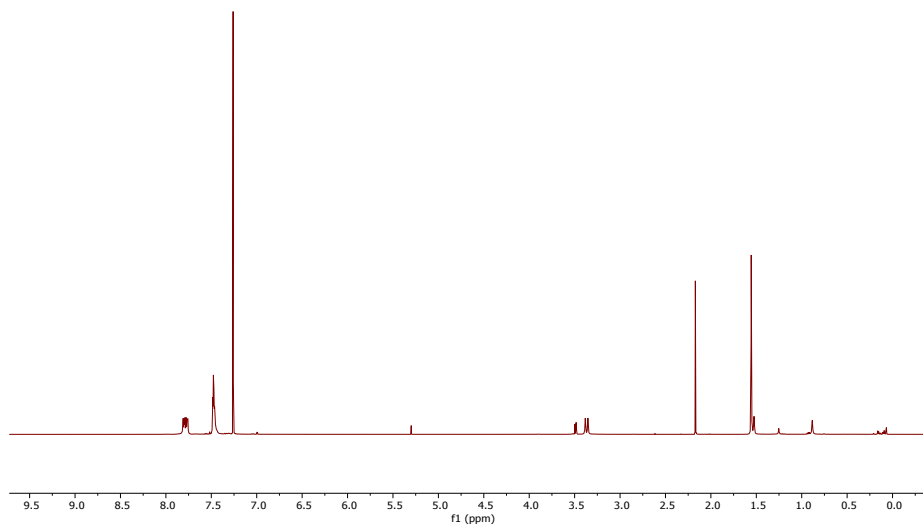

**Figure S15.**  $^1\text{H}$  NMR spectrum of **4** in  $\text{CDCl}_3$ .

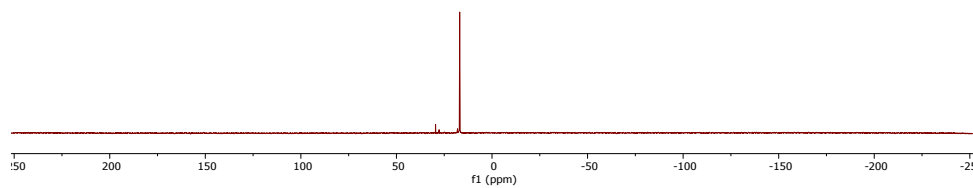

**Figure S16.**  $^{31}\text{P}$  NMR spectrum of **4** in  $\text{CDCl}_3$ .

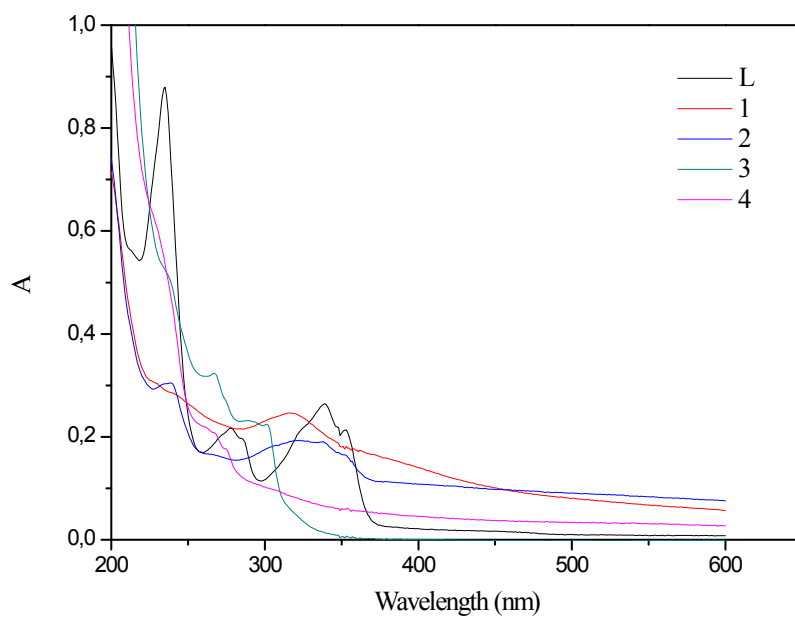

**Figure S17.** Absorption spectra in in acetonitrile of compounds **L** and **1-4** at *ca.*  $1 \cdot 10^{-5}$  M.

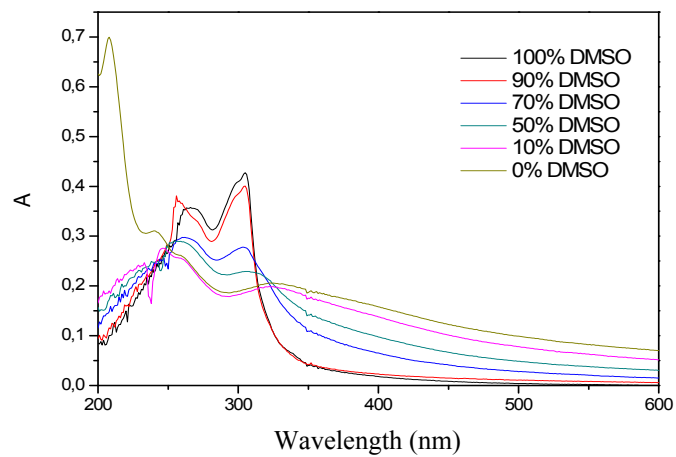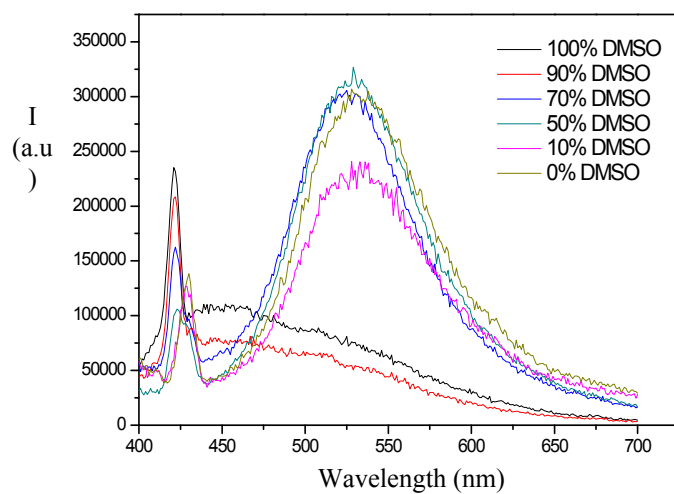

**Figure S18.** Absorption (above) and emission (below) spectra of **1** at different DMSO-water content.

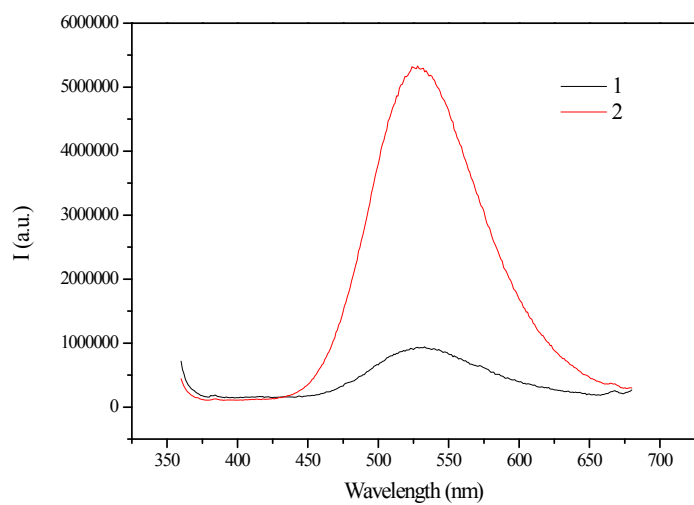

**Figure S19.** Solid emission spectra of **1** and **2** ( $\lambda_{\text{exc}} = 350$  nm).

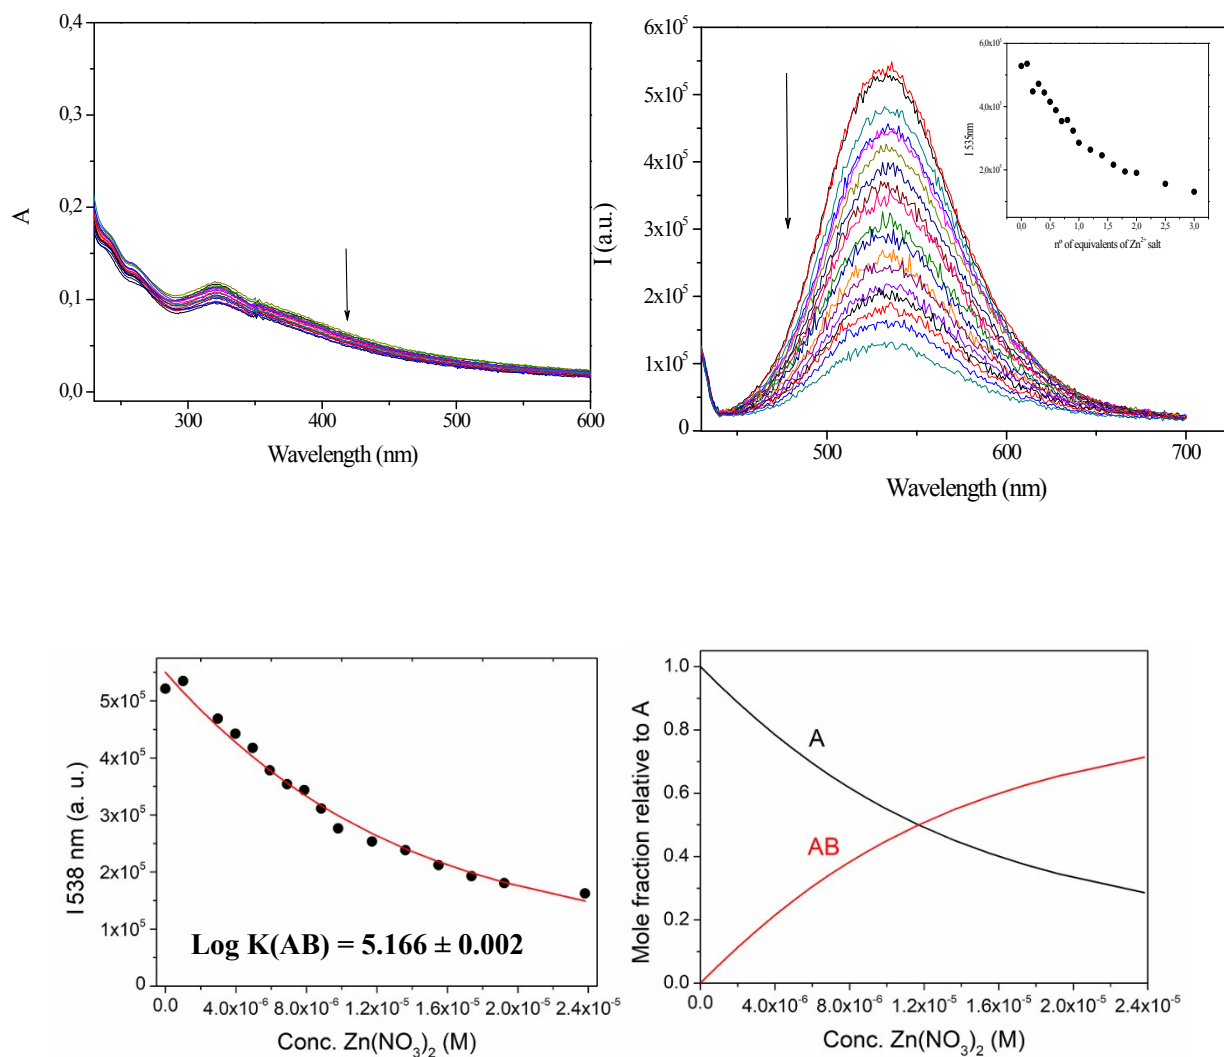

**Figure S20.** (above) Absorption and emission titrations of **1** with increasing amounts of  $\text{Zn}(\text{NO}_3)_2$  in methanol at  $1 \cdot 10^{-5}\text{M}$ ; (below) Left: Variations in the emission maximum of compound **1** ( $1 \cdot 10^{-5}\text{M}$ ) upon addition of  $\text{Zn}(\text{NO}_3)_2$  in MeOH. Fitting of the spectral variations with HypSpec program agrees with the formation of the 1:1 complex. Right: Calculated mole fractions of free compound **1** (A) and complex 1:1 (AB) with increasing amounts of  $\text{Zn}(\text{NO}_3)_2$ .

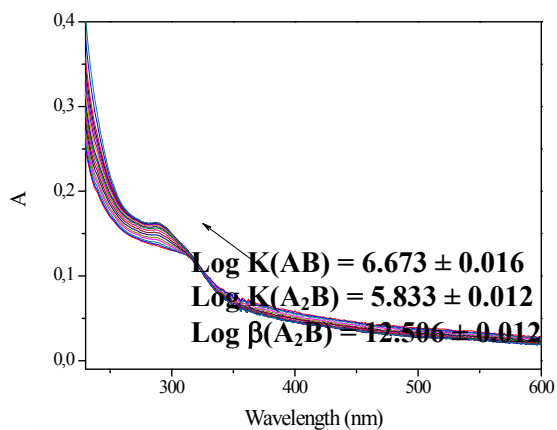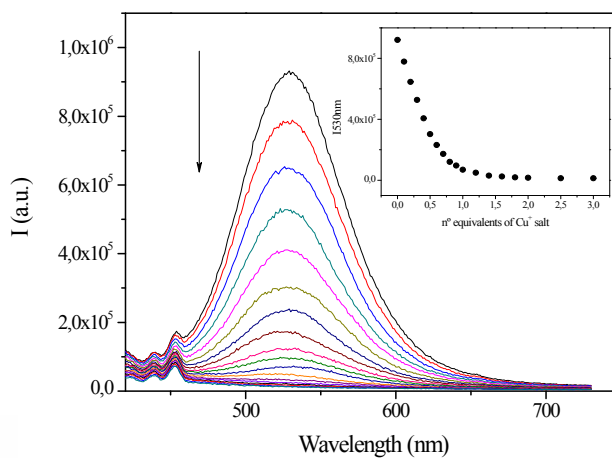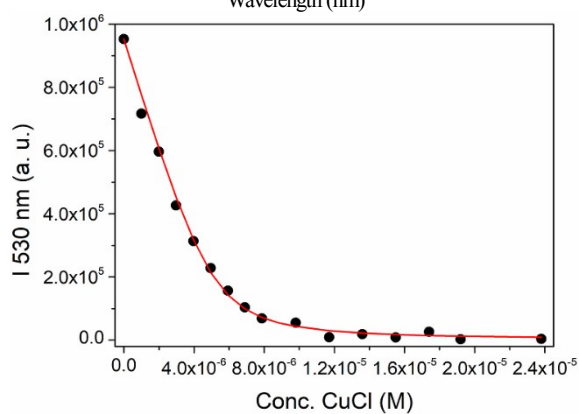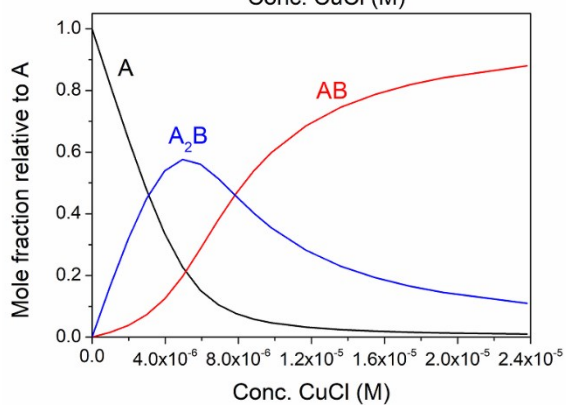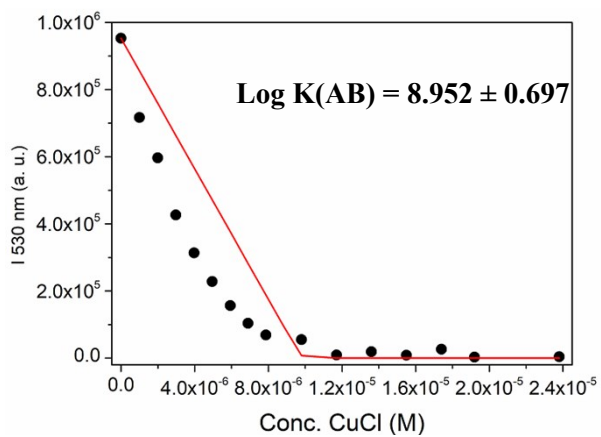

**Figure S21.** (above) Absorption and emission titrations of **1** with increasing amounts of CuCl in acetonitrile at  $1 \cdot 10^{-5} \text{M}$ ; (middle) Left: Variations in the emission maximum of compound **1** ( $1 \cdot 10^{-5} \text{M}$ ) upon addition of CuCl in  $\text{CH}_3\text{CN}$ . Fitting of the spectral variations with HypSpec program agrees with the formation of the 1:1 complex (AB) and the intermediate species ( $\text{A}_2\text{B}$ ). Right: Calculated mole fractions of free compound **1** (A) and complexes 2:1 ( $\text{A}_2\text{B}$ ) and 1:1 (AB) with increasing amounts of CuCl; (below) Best fitting calculated with HypSpec corresponding to the emission titration of compound **1** ( $1 \cdot 10^{-5} \text{M}$ ) with increasing amounts of CuCl in  $\text{CH}_3\text{CN}$ , considering only formation of complex 1:1.

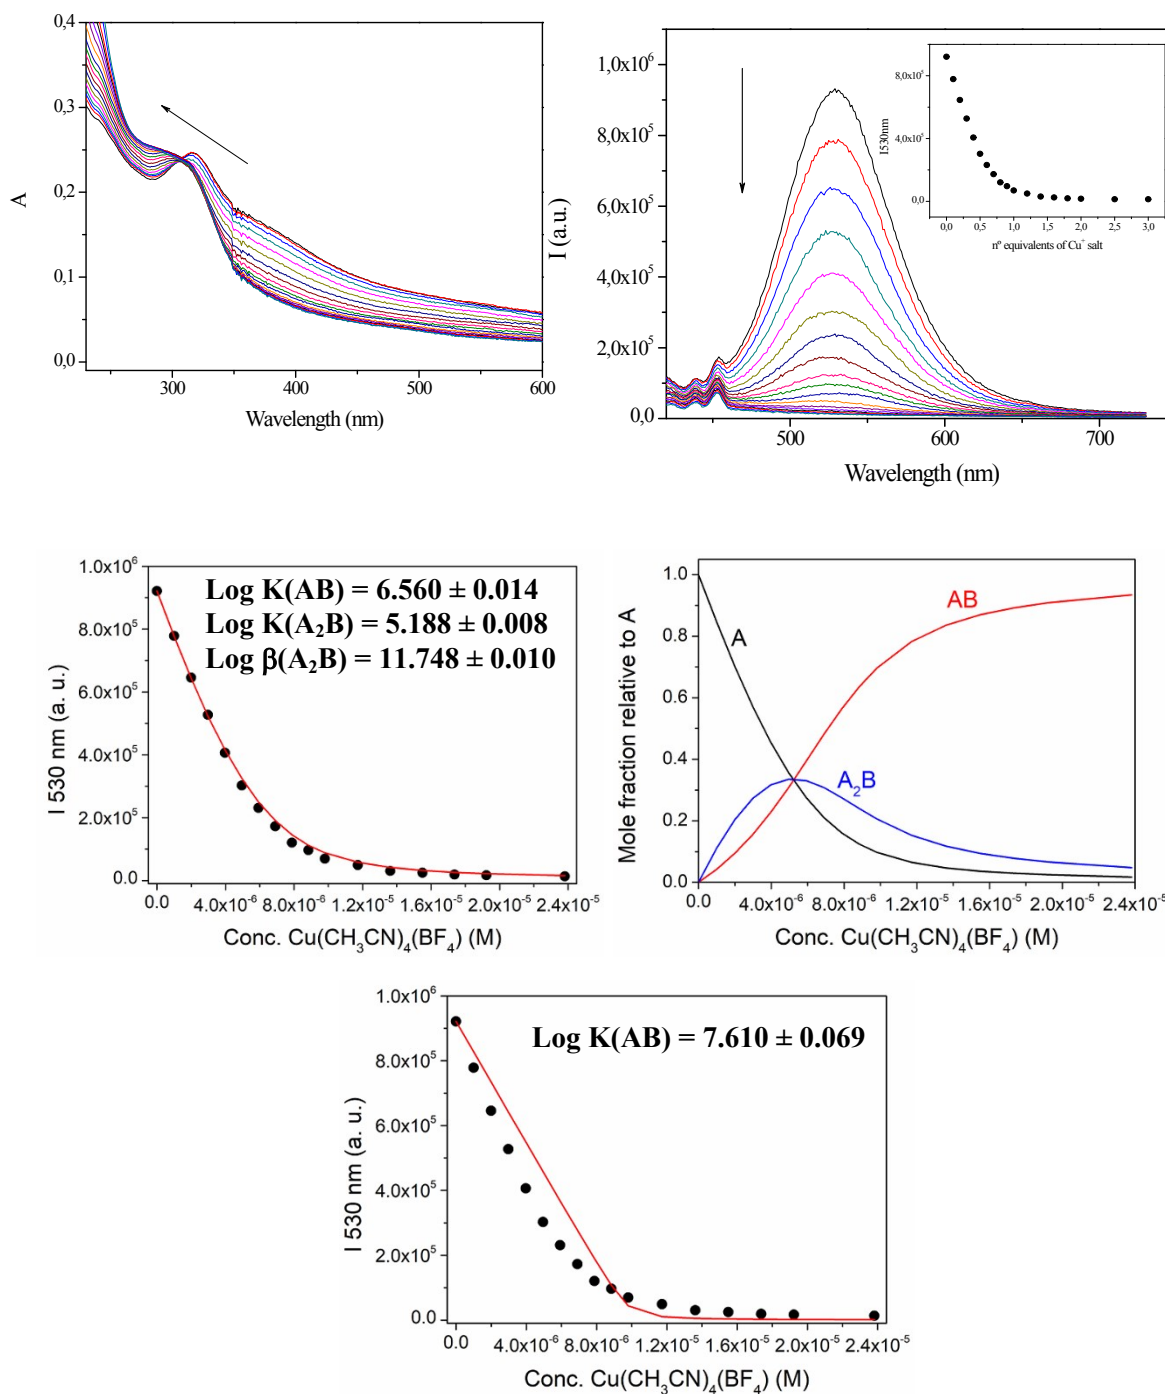



**Figure S22.** (above) Absorption and emission titrations of **1** with increasing amounts of  $[\text{Cu}(\text{CH}_3\text{CN})_4](\text{BF}_4)$  in acetonitrile at  $1 \cdot 10^{-5}\text{M}$ ; (middle) Left: Variations in the emission maximum of compound **1** ( $1 \cdot 10^{-5}\text{M}$ ) upon addition of  $\text{Cu}(\text{CH}_3\text{CN})_4(\text{BF}_4)$  in  $\text{CH}_3\text{CN}$ . Fitting of the spectral variations with HypSpec program agrees with the formation of the 1:1 complex (AB) and the intermediate species ( $\text{A}_2\text{B}$ ). Right: Calculated mole fractions of free compound **1** (A) and complexes 2:1 ( $\text{A}_2\text{B}$ ) and 1:1 (AB) with increasing amounts of  $\text{Cu}(\text{CH}_3\text{CN})_4(\text{BF}_4)$ ; (below) Best fitting calculated with HypSpec corresponding to the emission titration of compound **1** ( $1 \cdot 10^{-5}\text{M}$ ) with increasing amounts of  $\text{Cu}(\text{CH}_3\text{CN})_4(\text{BF}_4)$  in  $\text{CH}_3\text{CN}$ , considering only formation of complex 1:1.

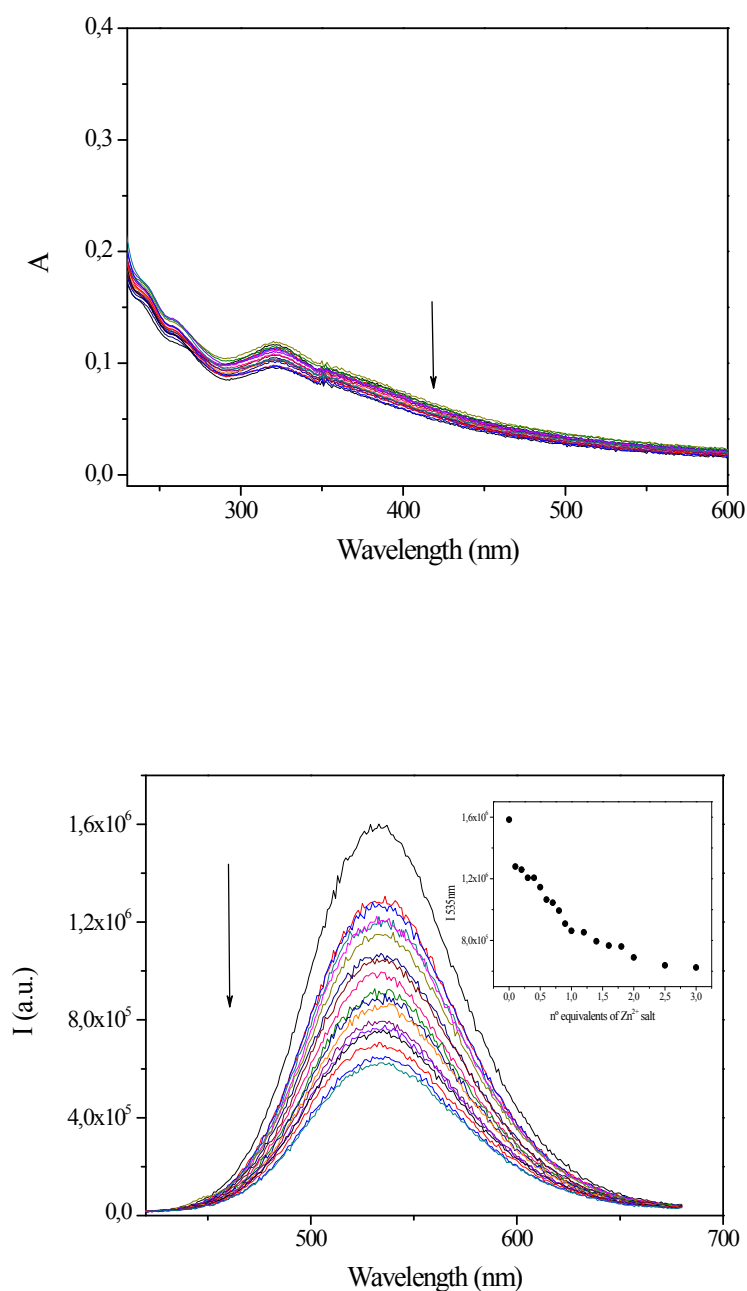

**Figure S23.** Absorption (above) and emission (below) titrations of **2** with increasing amounts of  $\text{Zn}(\text{NO}_3)_2$  in methanol at  $1 \cdot 10^{-5}\text{M}$ .

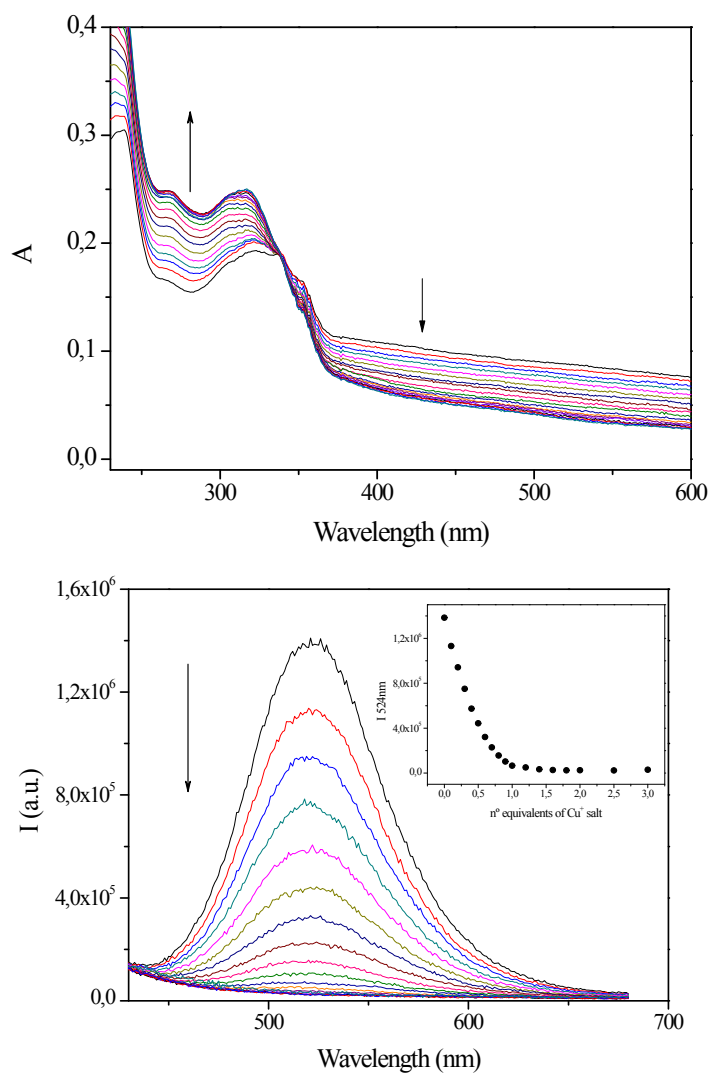

**Figure S24.** Absorption (above) and emission (below) titrations of **2** with increasing amounts of  $\text{CuCl}$  in acetonitrile at  $1 \cdot 10^{-5}\text{M}$ .

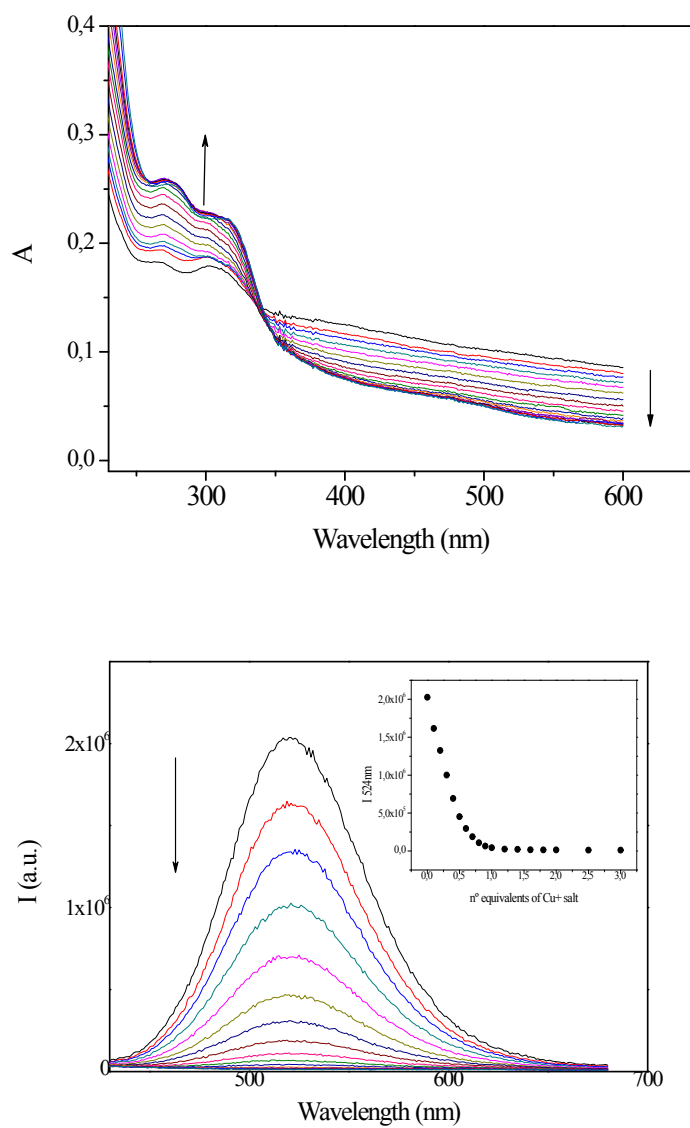

**Figure S25.** Absorption (above) and emission (below) titrations of **2** with increasing amounts of  $[\text{Cu}(\text{CH}_3\text{CN})_4](\text{BF}_4)$  in acetonitrile at  $1 \cdot 10^{-5}\text{M}$ .

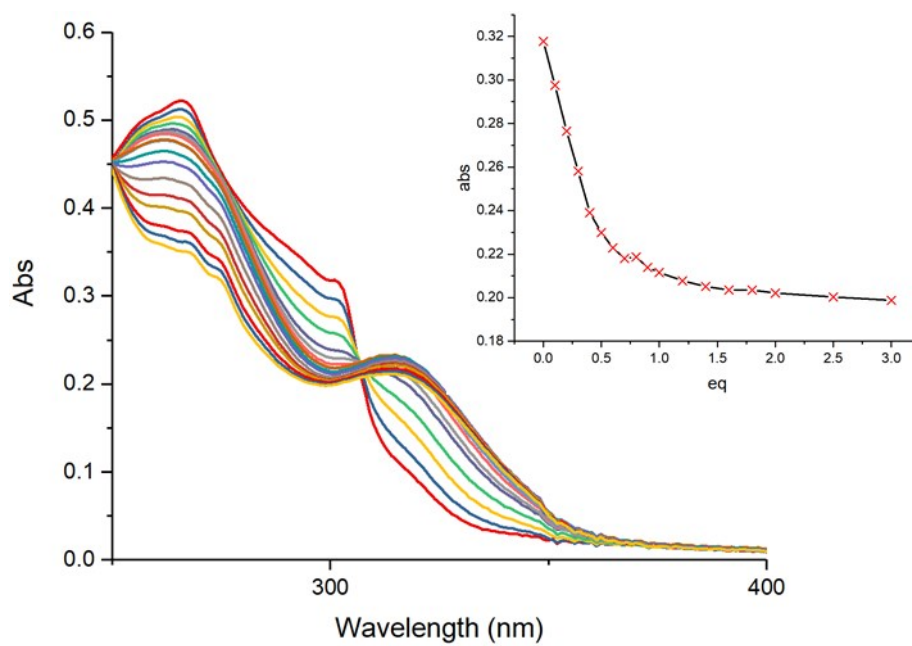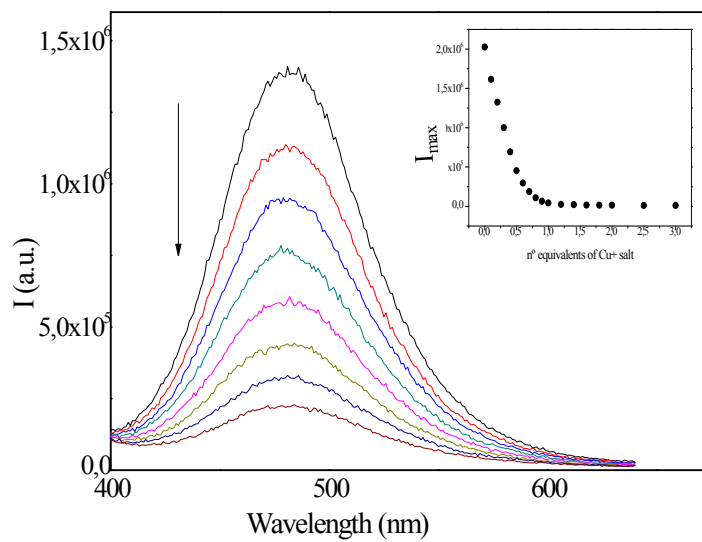

**Figure S26.** Absorption (above) and emission (below) titrations of **3** with increasing amounts of  $\text{Zn}(\text{NO}_3)_2$  in acetonitrile at  $1 \cdot 10^{-5}\text{M}$ .

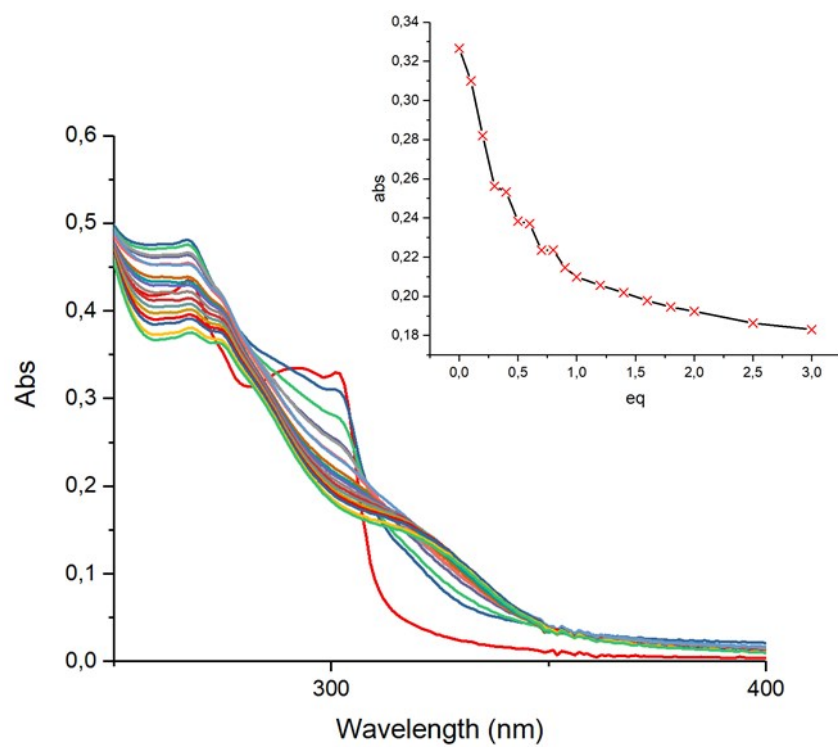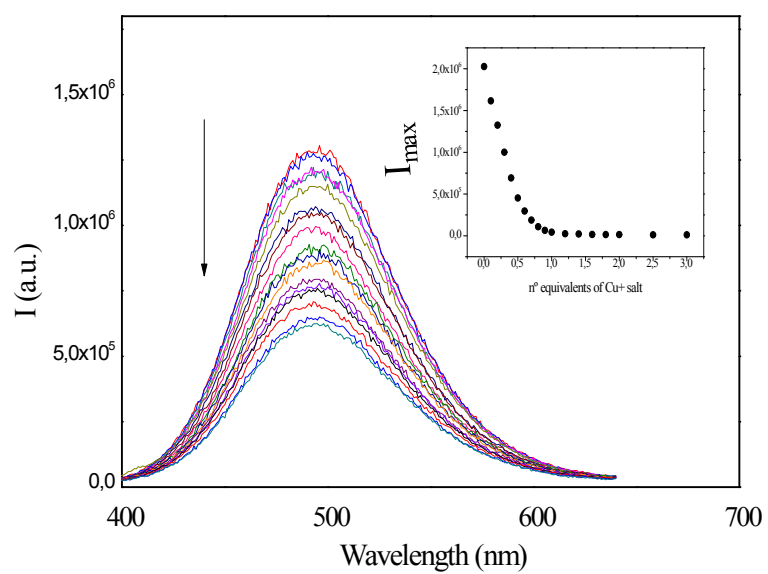

**Figure S27.** Absorption (above) and emission (below) titrations of **3** with increasing amounts of CuCl in acetonitrile at  $1 \cdot 10^{-5} \text{M}$ .

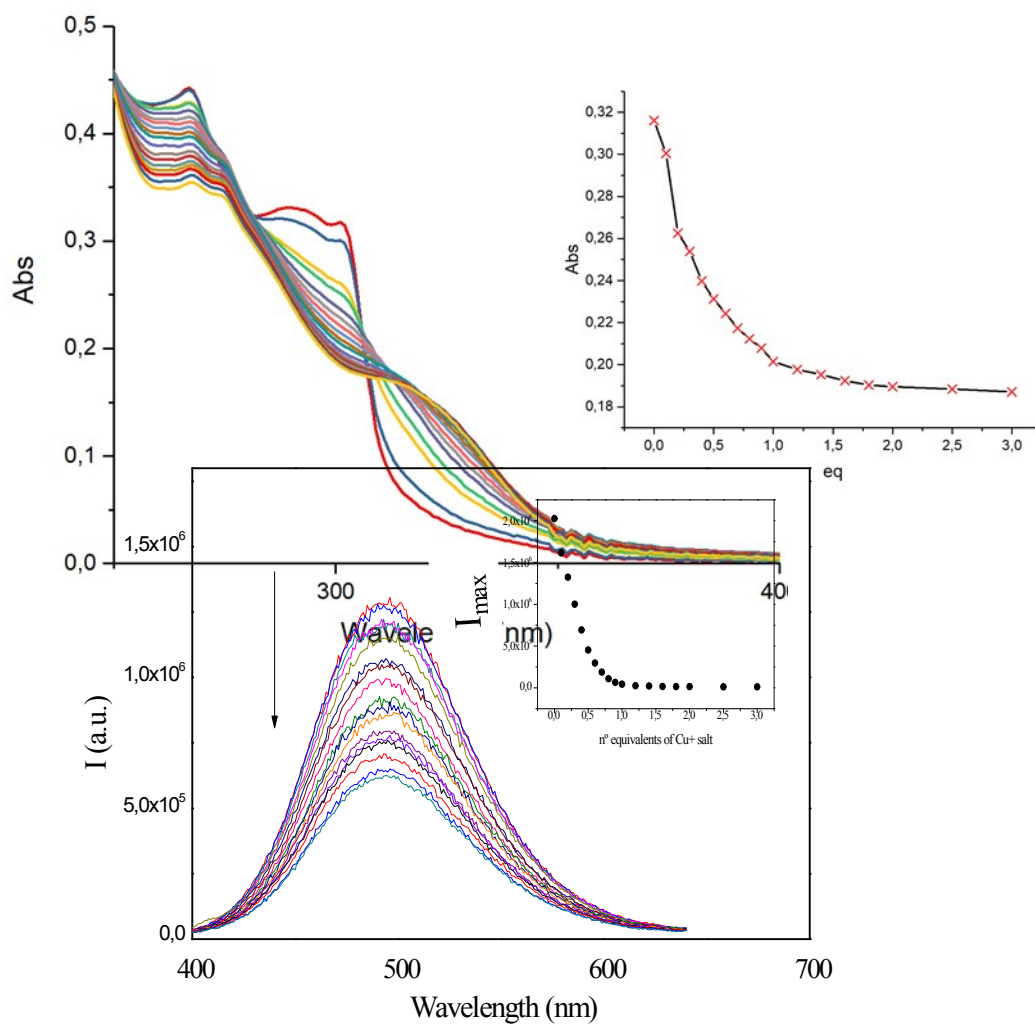

**Figure S28.** Absorption (above) and emission (below) titrations of **3** with increasing amounts of  $[\text{Cu}(\text{CH}_3\text{CN})_4](\text{BF}_4)$  in acetonitrile at  $1 \cdot 10^{-5} \text{M}$ .

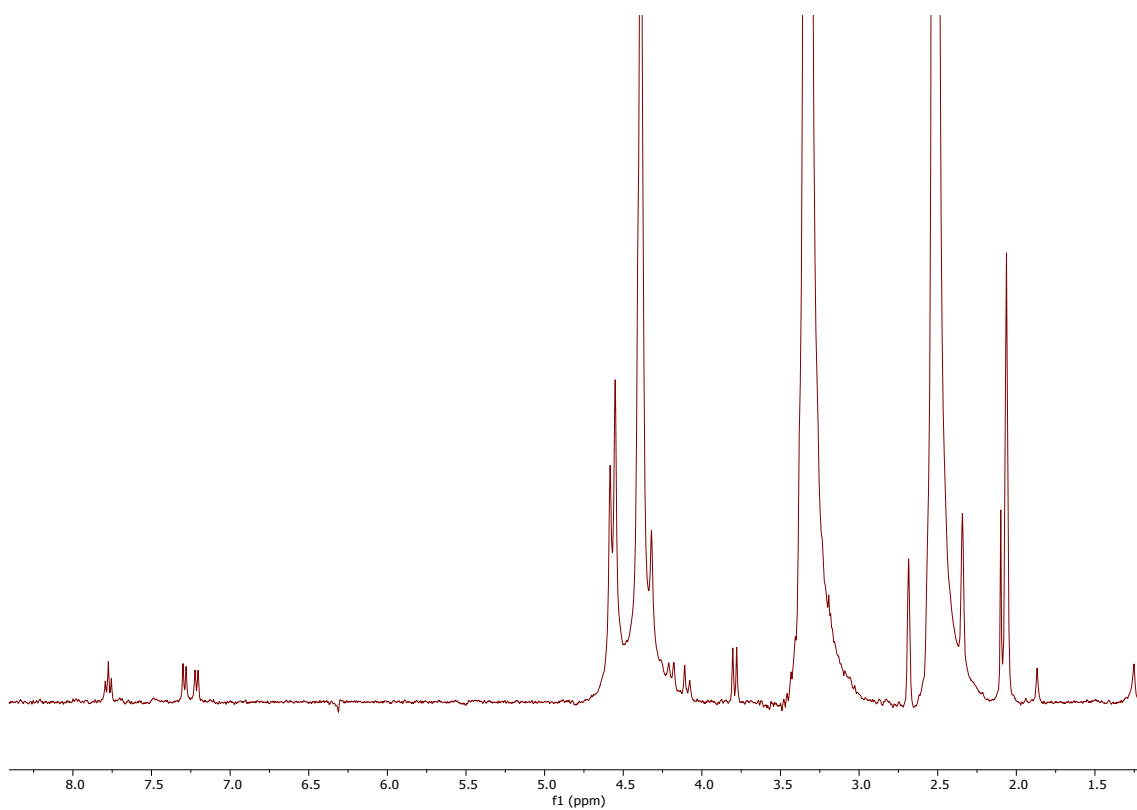

**Figure S29.**  $^1\text{H}$  NMR spectrum of **1a** in  $\text{DMSO-d}_6$

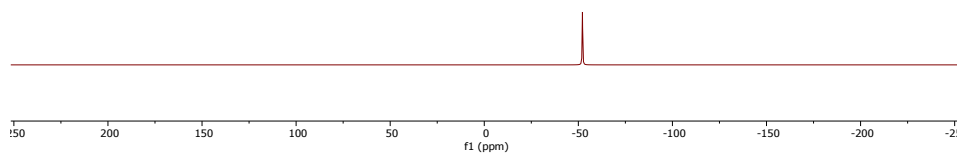

**Figure S30.**  $^{31}\text{P}$  NMR spectrum of **1a** in  $\text{DMSO-d}_6$

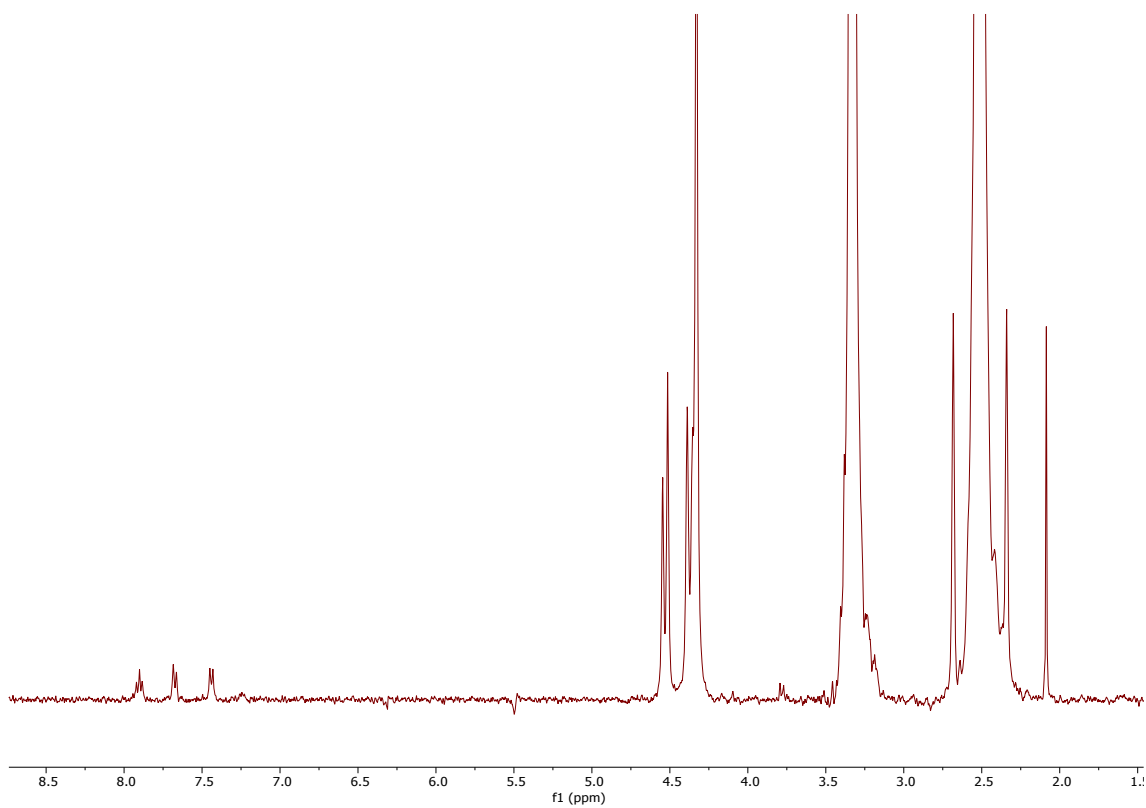

**Figure S31.**  $^1\text{H}$  NMR spectrum of **1b** in  $\text{DMSO-d}_6$

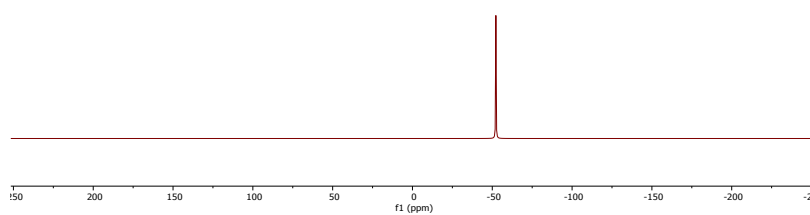

**Figure S32.**  $^{31}\text{P}$  NMR spectrum of **1b** in  $\text{DMSO-d}_6$



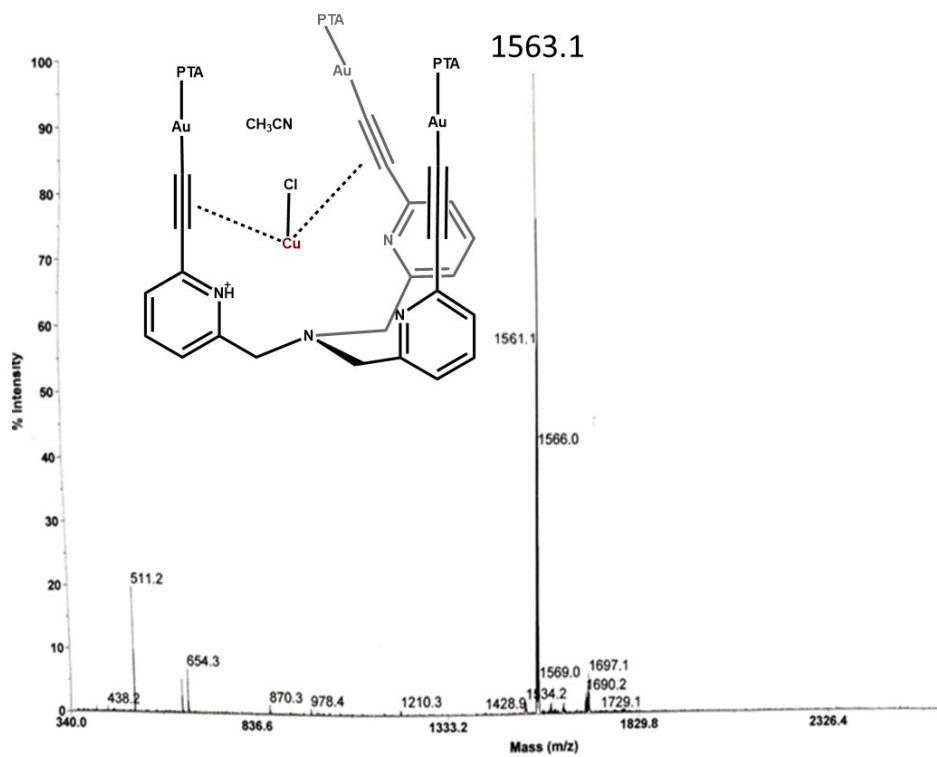

**Figure S33.** MALDI-TOF(+) mass spectrum of compound **1b**.

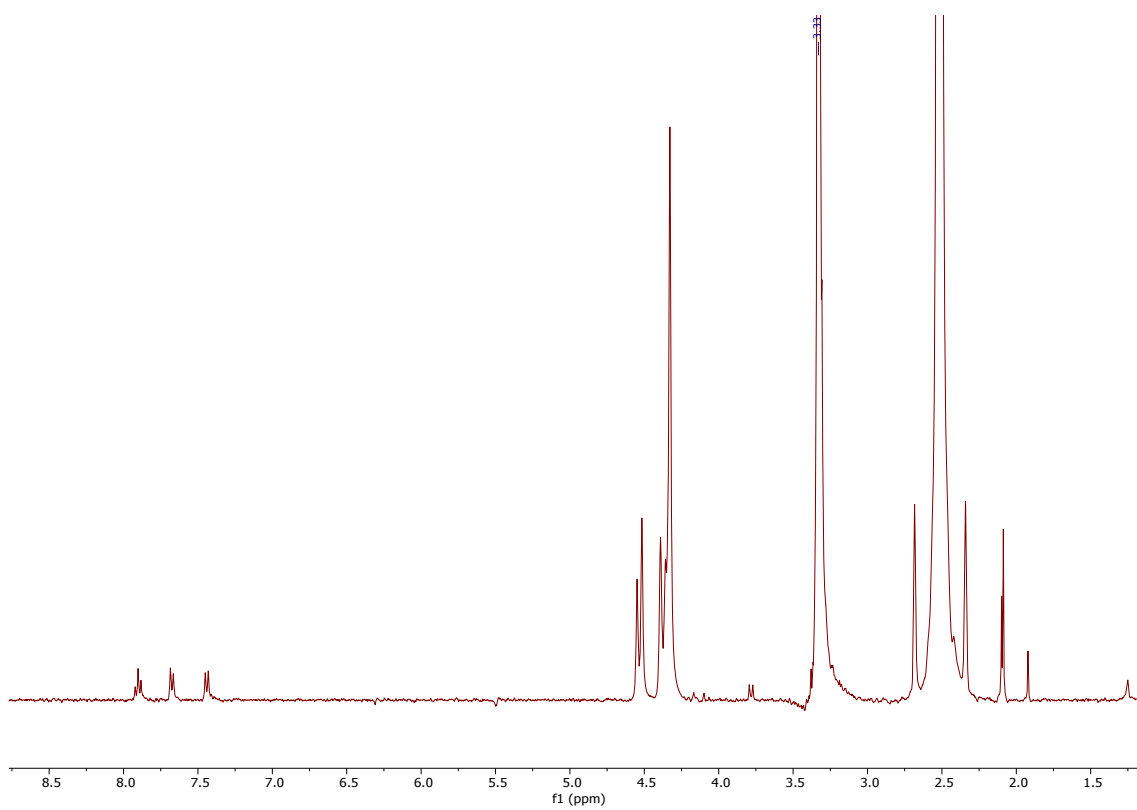

**Figure S34.** <sup>1</sup>H NMR spectrum of **1c** in DMSO-d<sub>6</sub>

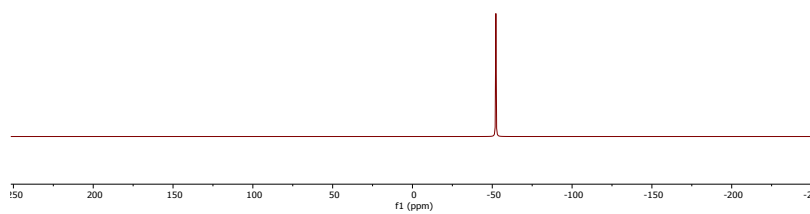

**Figure S35.** <sup>31</sup>P NMR spectrum of **1c** in DMSO-d<sub>6</sub>

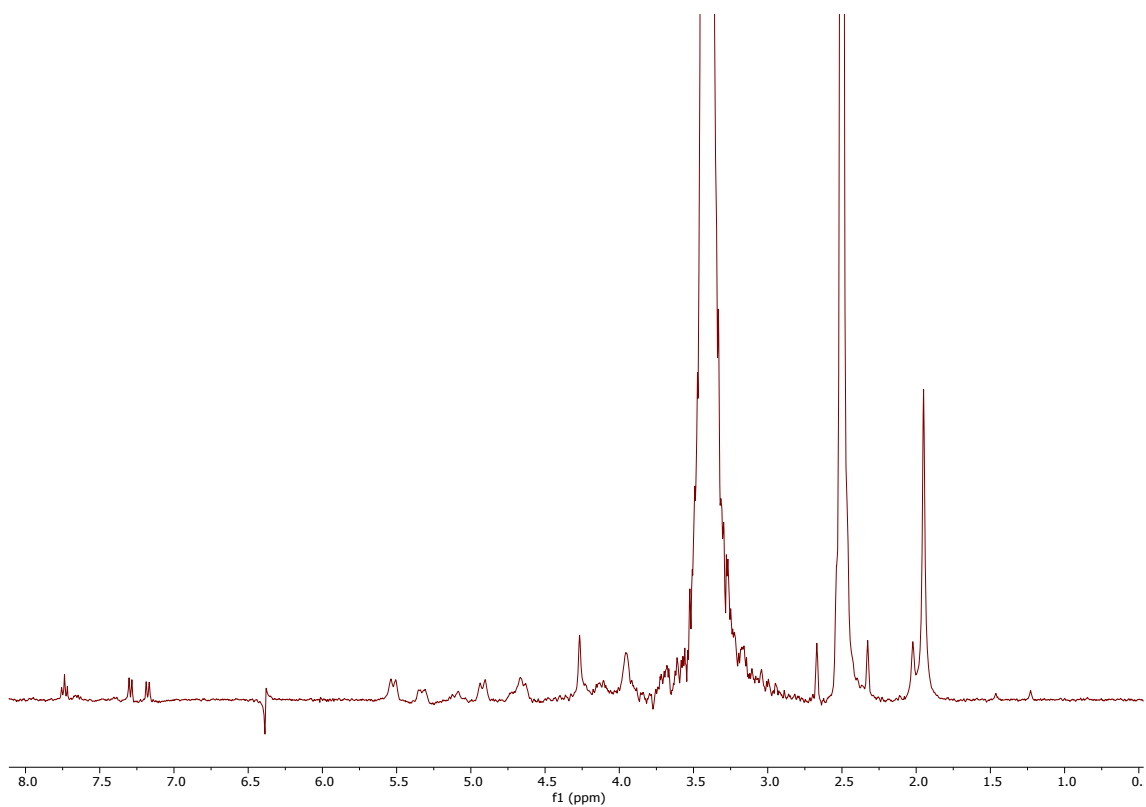

**Figure S36.**  $^1\text{H}$  NMR spectrum of **2a** in  $\text{DMSO-d}_6$

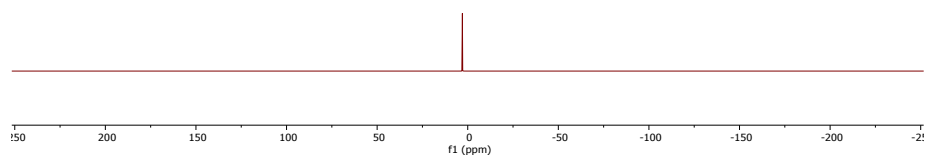

**Figure S37.**  $^{31}\text{P}$  NMR spectrum of **2a** in  $\text{DMSO-d}_6$

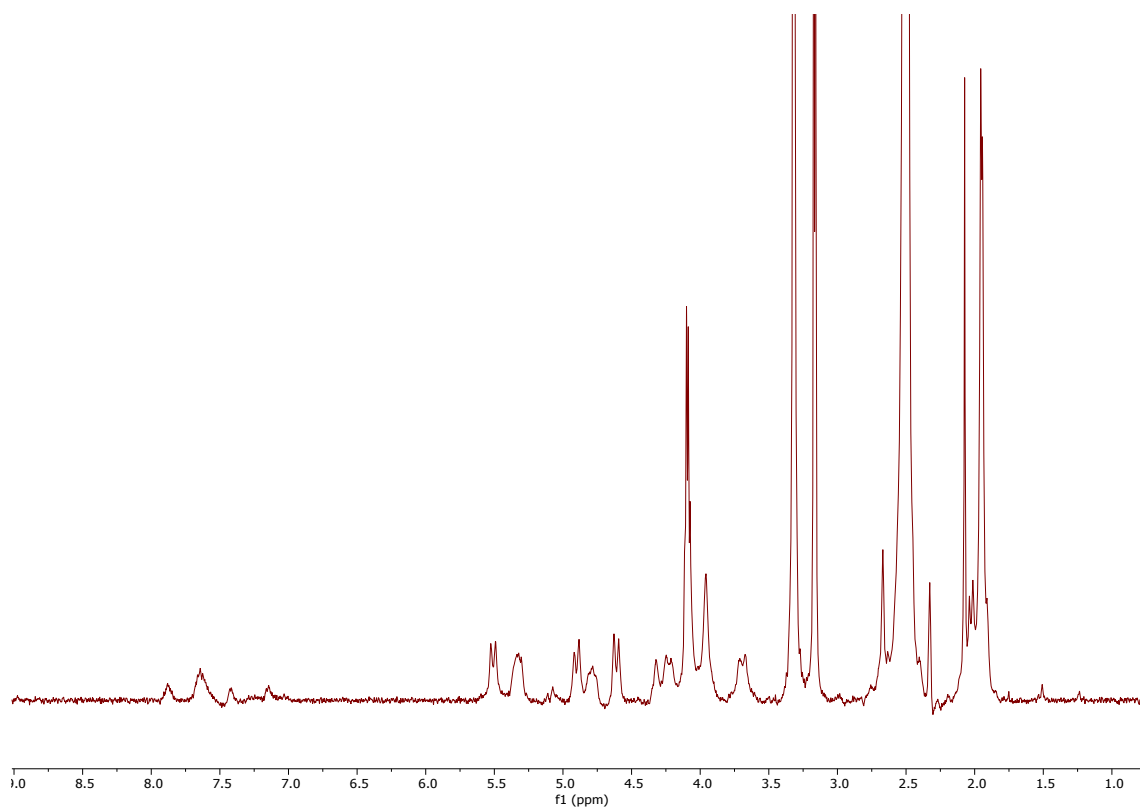

**Figure S38.**  $^1\text{H}$  NMR spectrum of **2b** in  $\text{DMSO-d}_6$

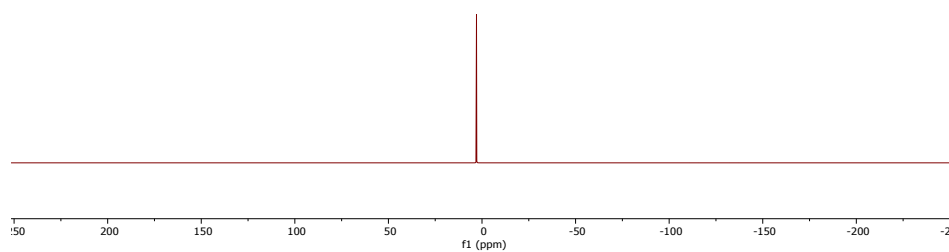

**Figure S39.**  $^{31}\text{P}$  NMR spectrum of **2b** in  $\text{DMSO-d}_6$

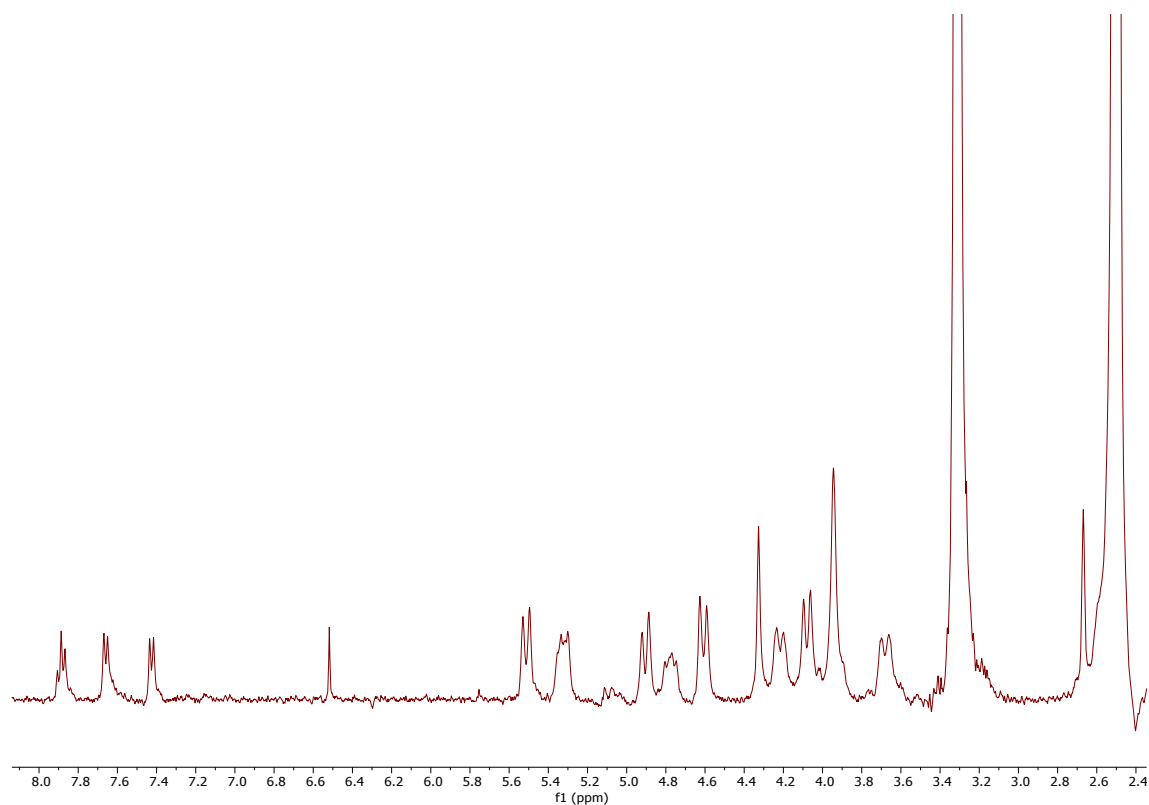

**Figure S40.**  $^1\text{H}$  NMR spectrum of **2c** in  $\text{DMSO-d}_6$

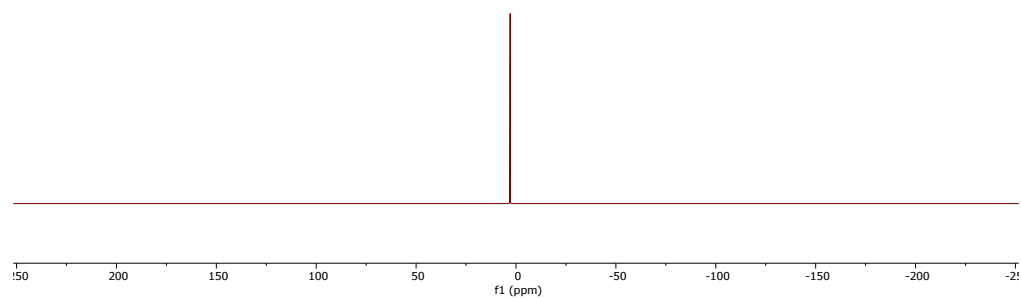

**Figure S41.**  $^{31}\text{P}$  NMR spectrum of **2c** in  $\text{DMSO-d}_6$

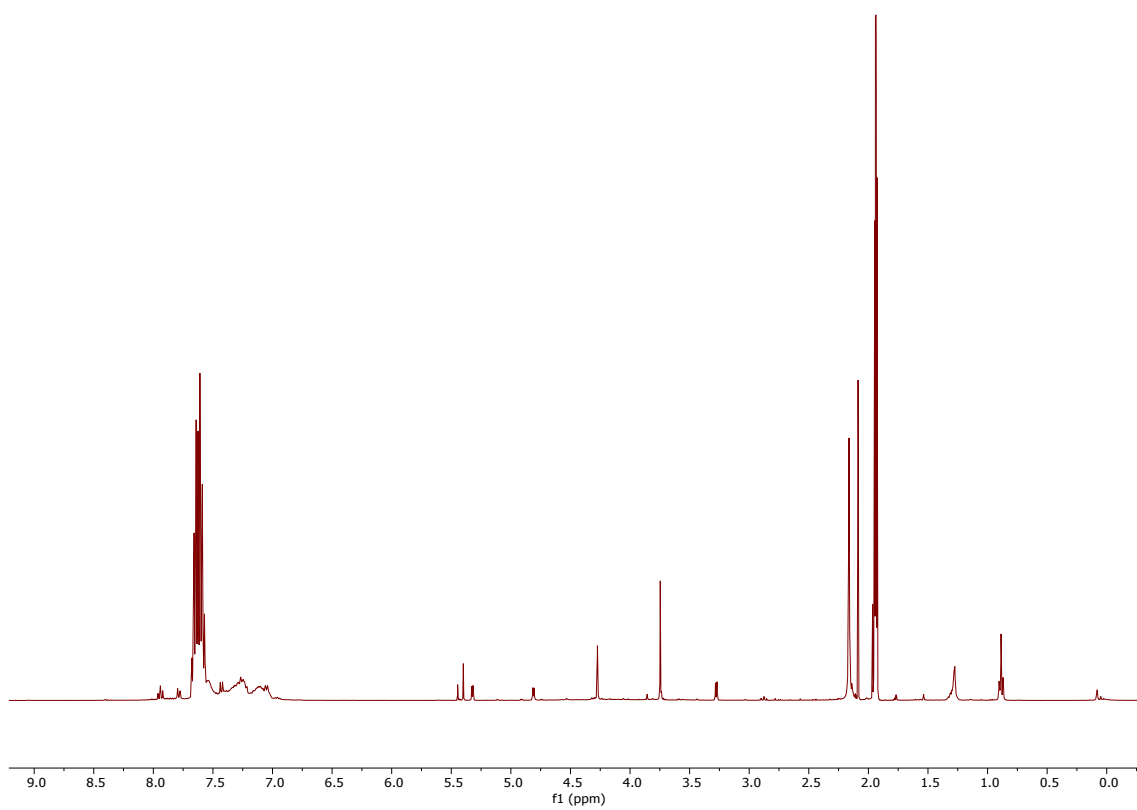

**Figure S42.** <sup>1</sup>H NMR spectrum of **3a** in ACN-d<sub>3</sub>

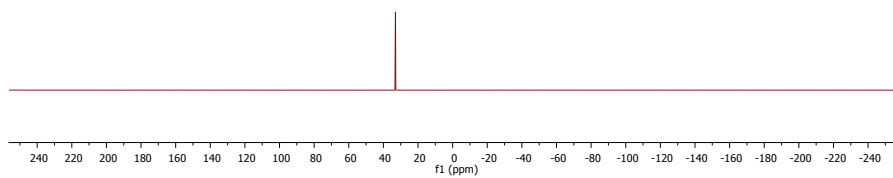

**Figure S43.** <sup>31</sup>P NMR spectrum of **3a** in ACN-d<sub>3</sub>

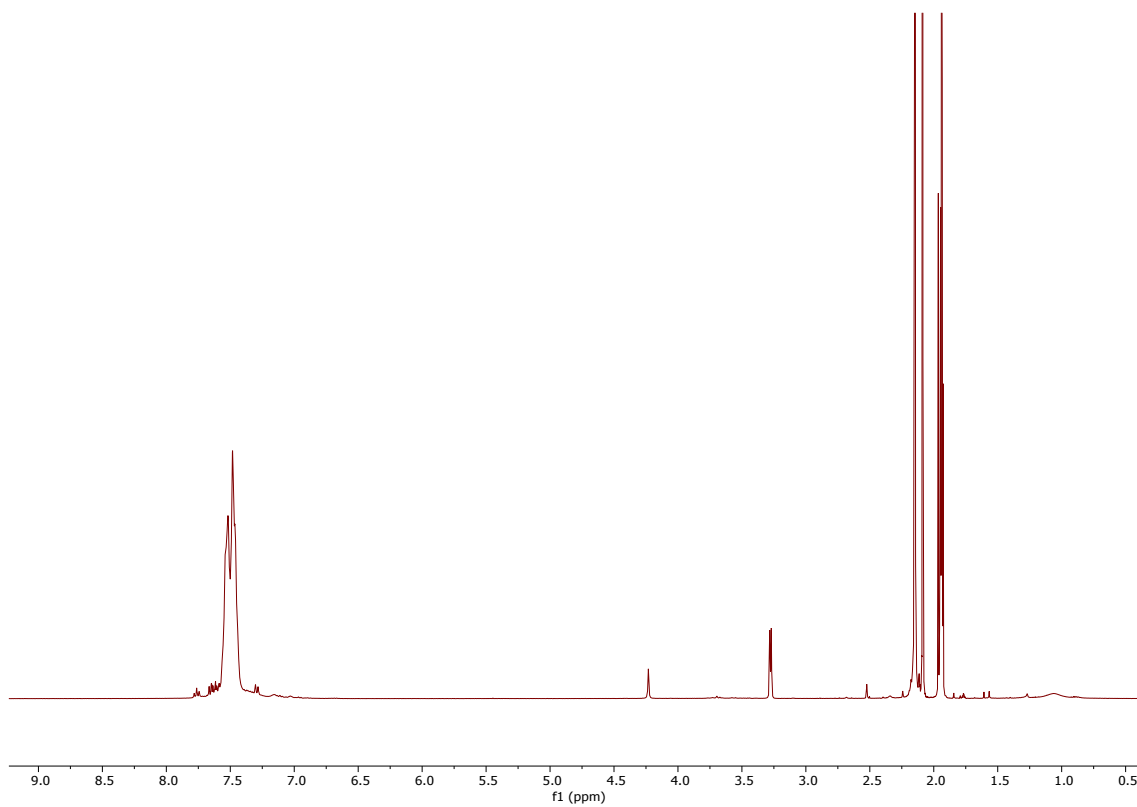

**Figure S44.**  $^1\text{H}$  NMR spectrum of **3b** in  $\text{ACN-d}_3$

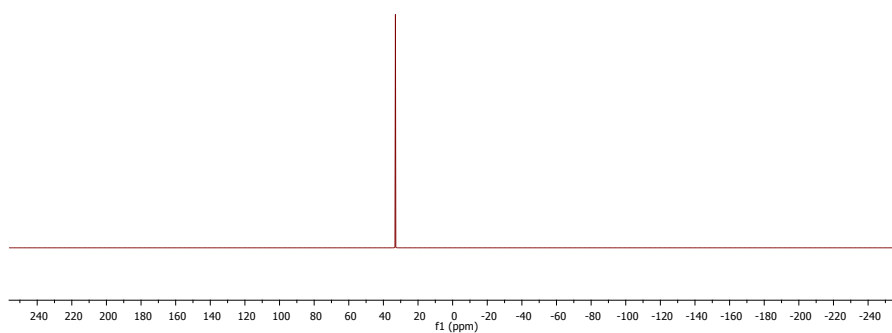

**Figure S45.**  $^{31}\text{P}$  NMR spectrum of **3b** in  $\text{ACN-d}_3$

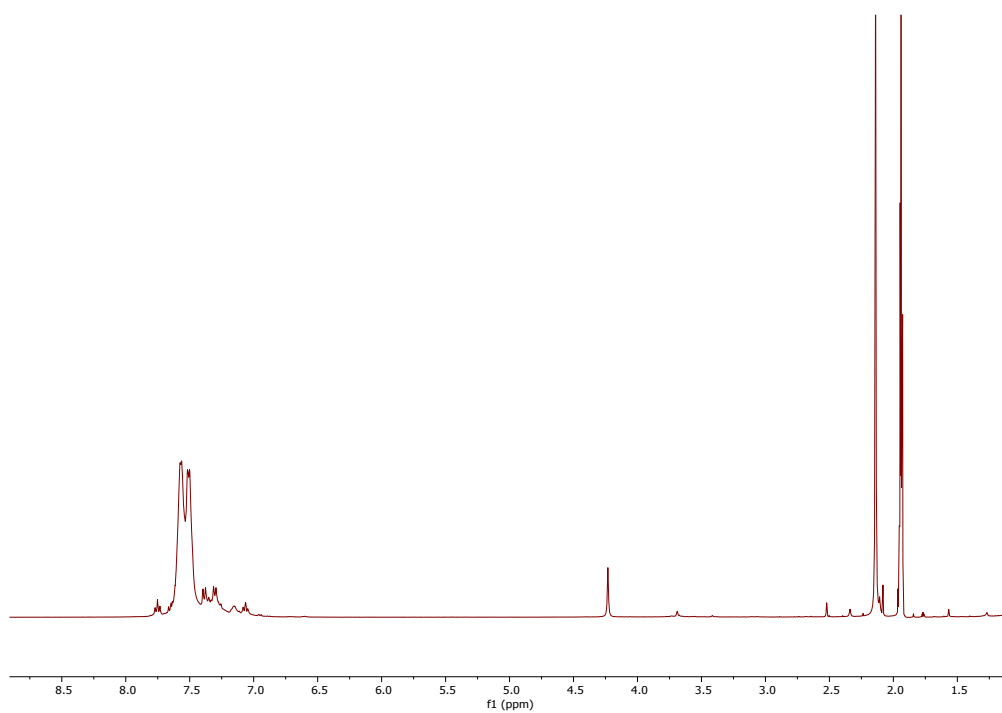

**Figure S46.**  $^1\text{H}$  NMR spectrum of **3c** in  $\text{ACN-d}_3$

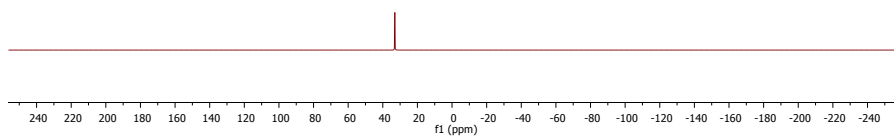

**Figure S47.**  $^{31}\text{P}$  NMR spectrum of **3c** in  $\text{ACN-d}_3$



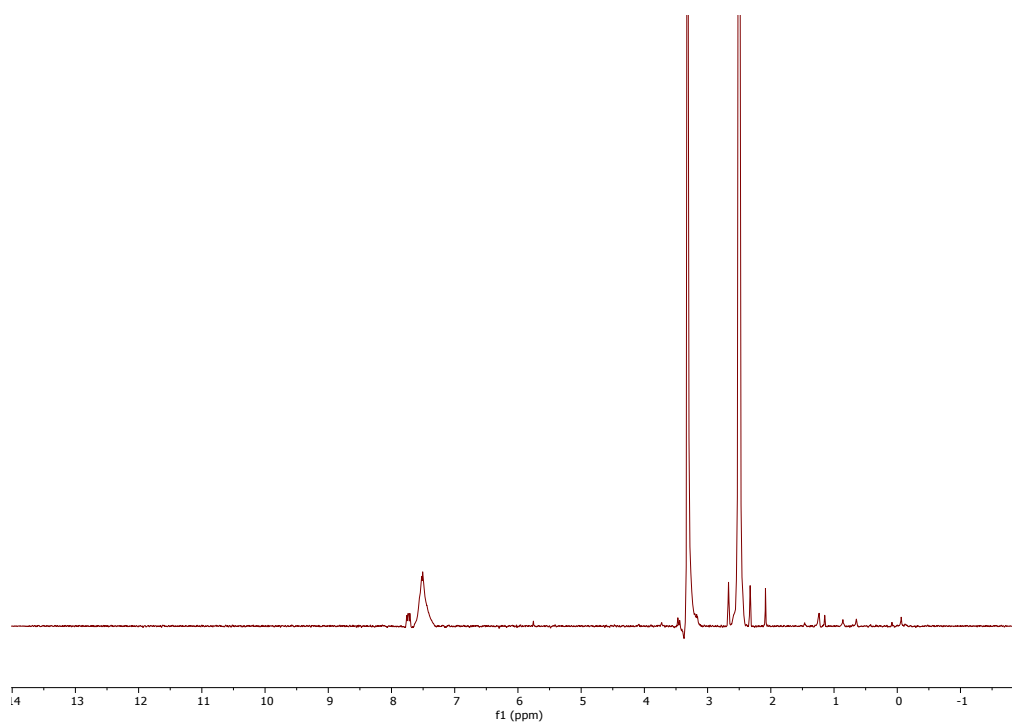

**Figure S48.**  $^1\text{H}$  NMR spectrum of **4a** in  $\text{DMSO-d}_6$

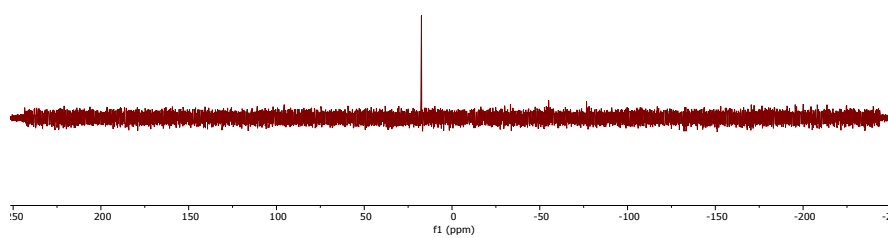

**Figure S49.**  $^{31}\text{P}$  NMR spectrum of **4a** in  $\text{DMSO-d}_6$

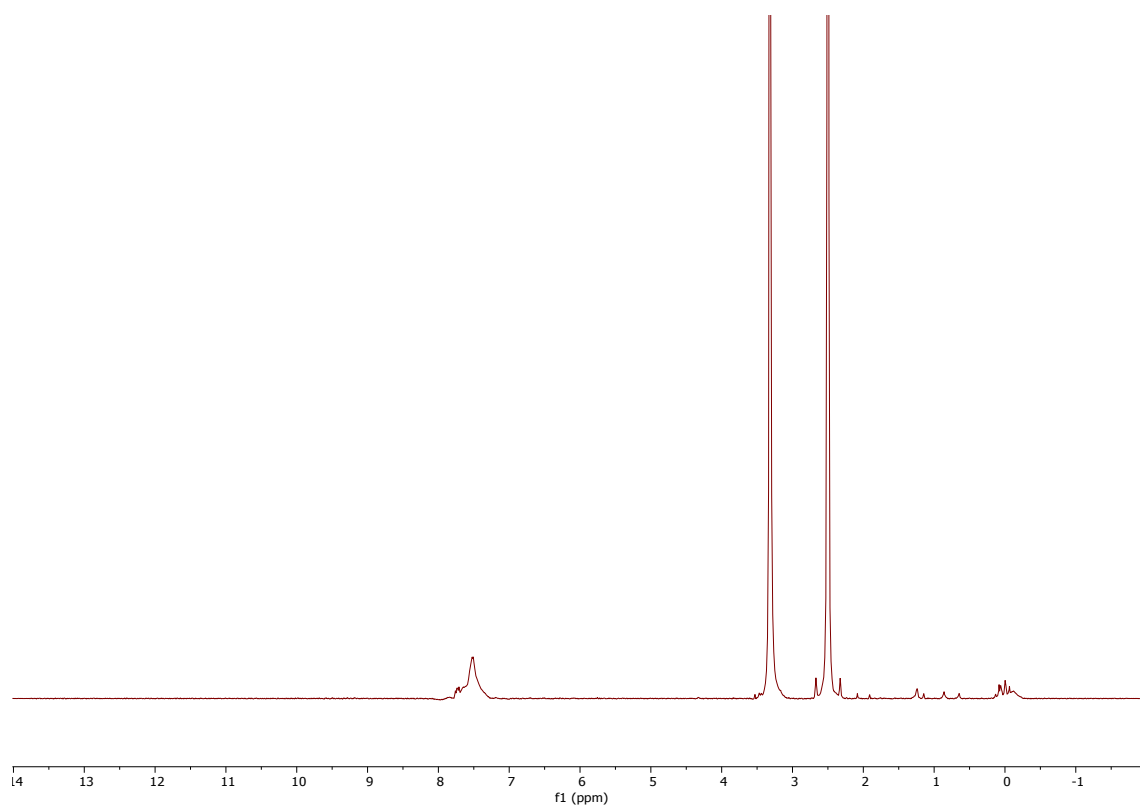

**Figure S50.**  $^1\text{H}$  NMR spectrum of **4b** in  $\text{DMSO-d}_6$

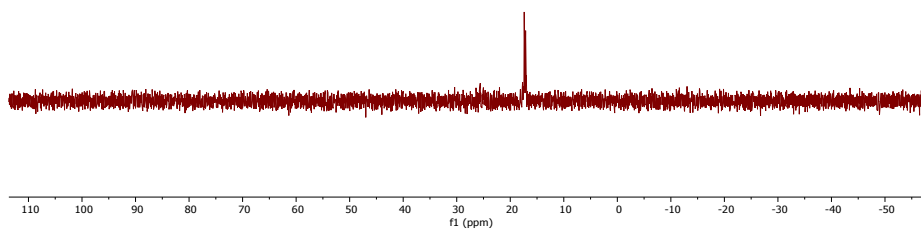

**Figure S51.**  $^{31}\text{P}$  NMR spectrum of **4b** in  $\text{DMSO-d}_6$

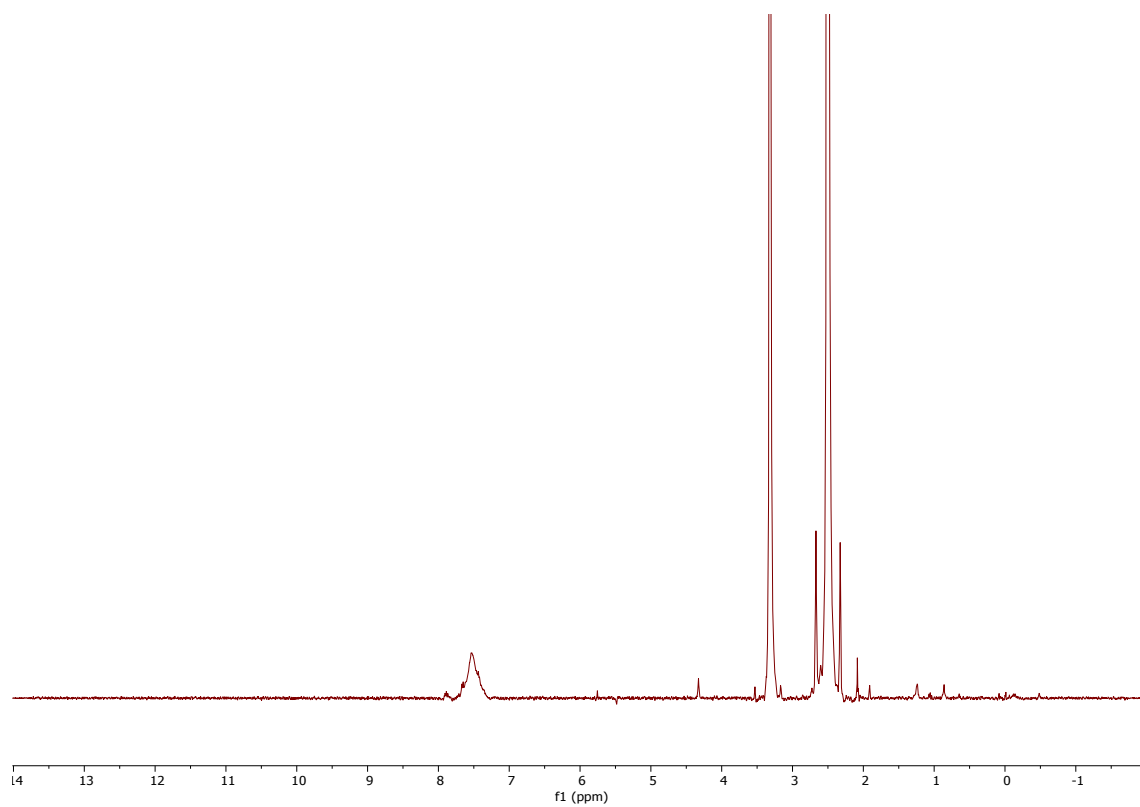

**Figure S52.**  $^1\text{H}$  NMR spectrum of **4c** in  $\text{DMSO-d}_6$

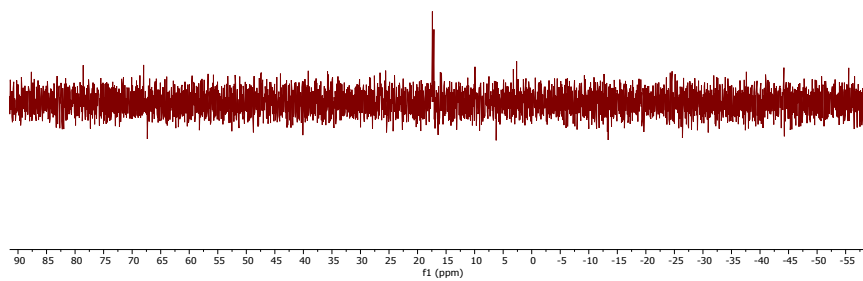

**Figure S53.**  $^{31}\text{P}$  NMR spectrum of **4c** in  $\text{DMSO-d}_6$

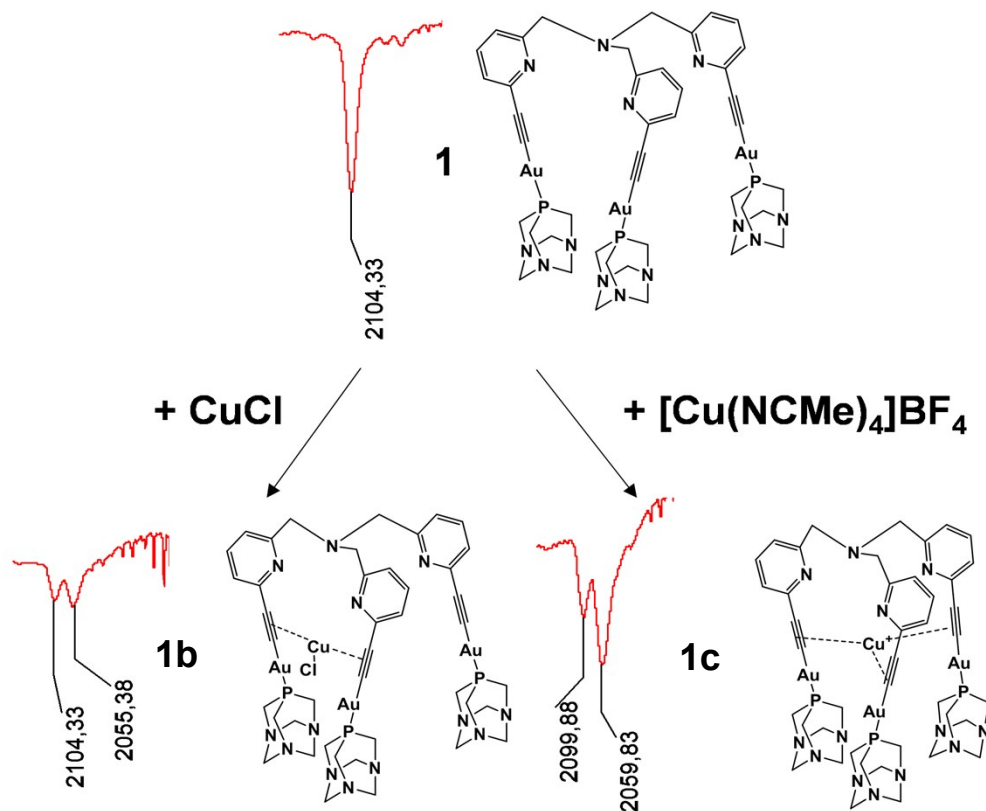

Figure S54. IR spectra of **1** and respective  $\text{Cu}^+$  derivatives of **1**.

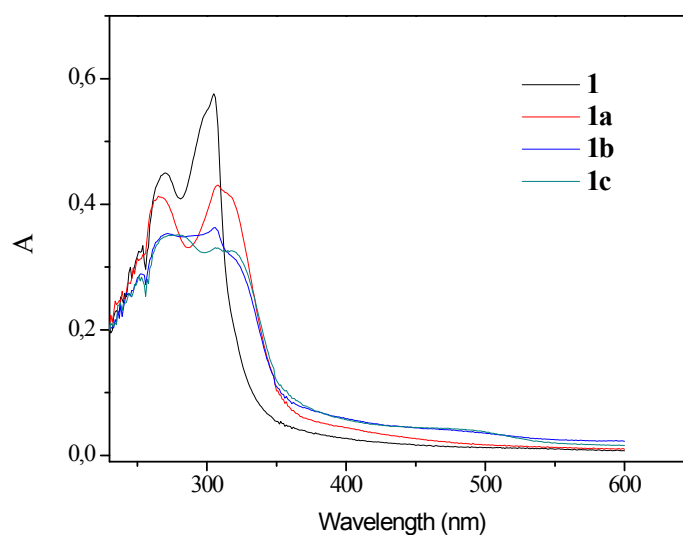

Figure S55. Absorption spectra of **1** and respective heterometallic complexes **1a-c** in DMSO at  $1 \cdot 10^{-5} \text{ M}$ .

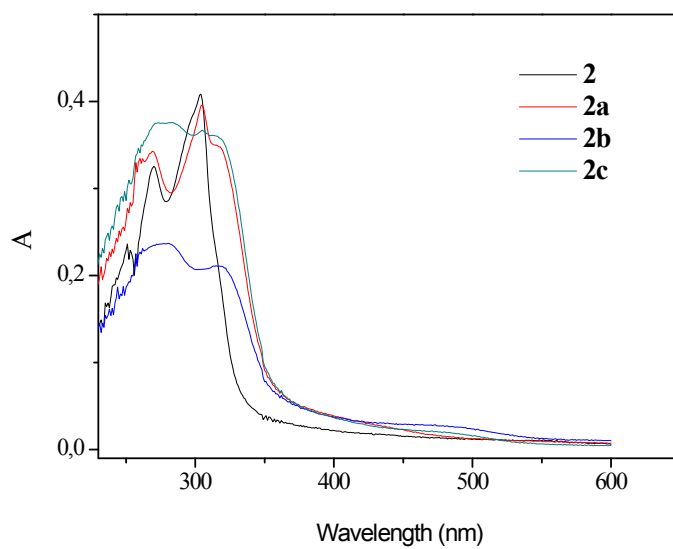

**Figure S56.** Absorption spectra of **2** and respective heterometallic complexes **1a-c** in DMSO at  $1 \cdot 10^{-5}M$ .

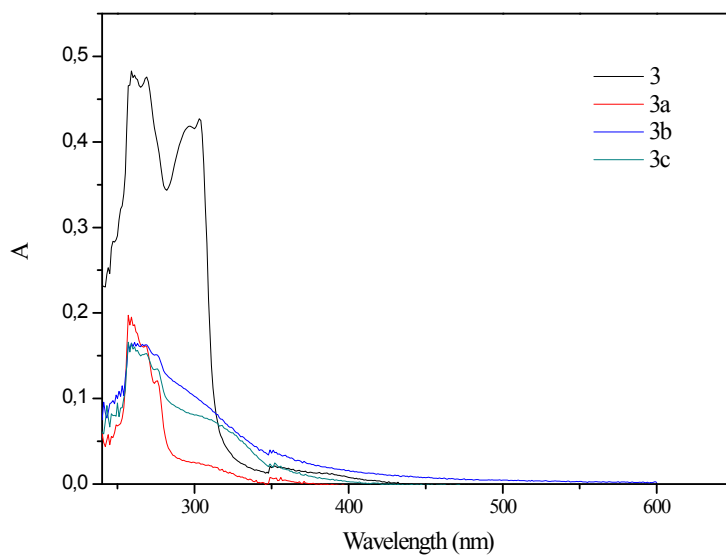

**Figure S57.** Absorption spectra of **3** and respective heterometallic complexes **3a-c** in DMSO at  $1 \cdot 10^{-5}M$ .

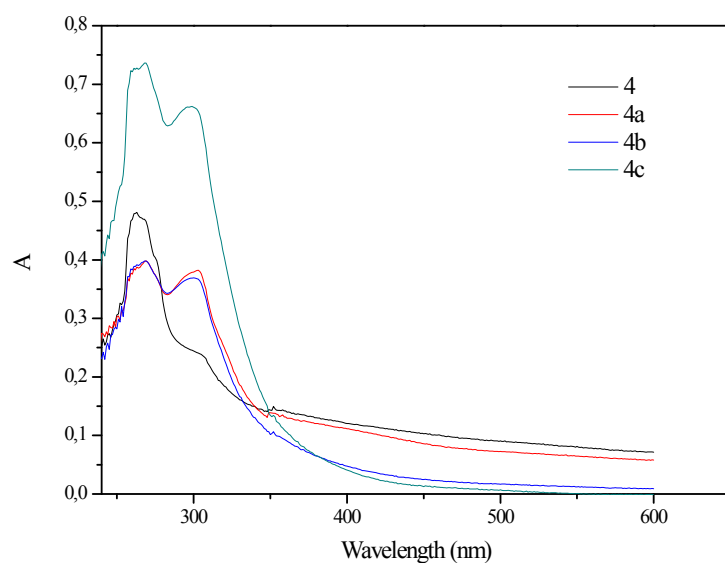

**Figure S58.** Absorption spectra of **4** and respective heterometallic complexes **4a-c** in DMSO at  $1 \cdot 10^{-5}M$ .

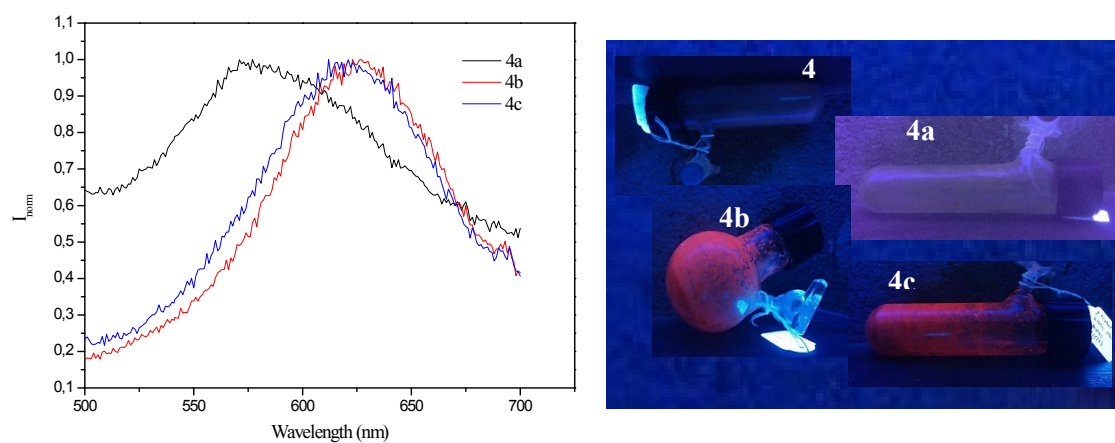

**Figure S59.** Normalized emission spectra in solid state of compounds **4**, **4a**, **4b** and **4c** (left); image of the solids observed under UV light (right).

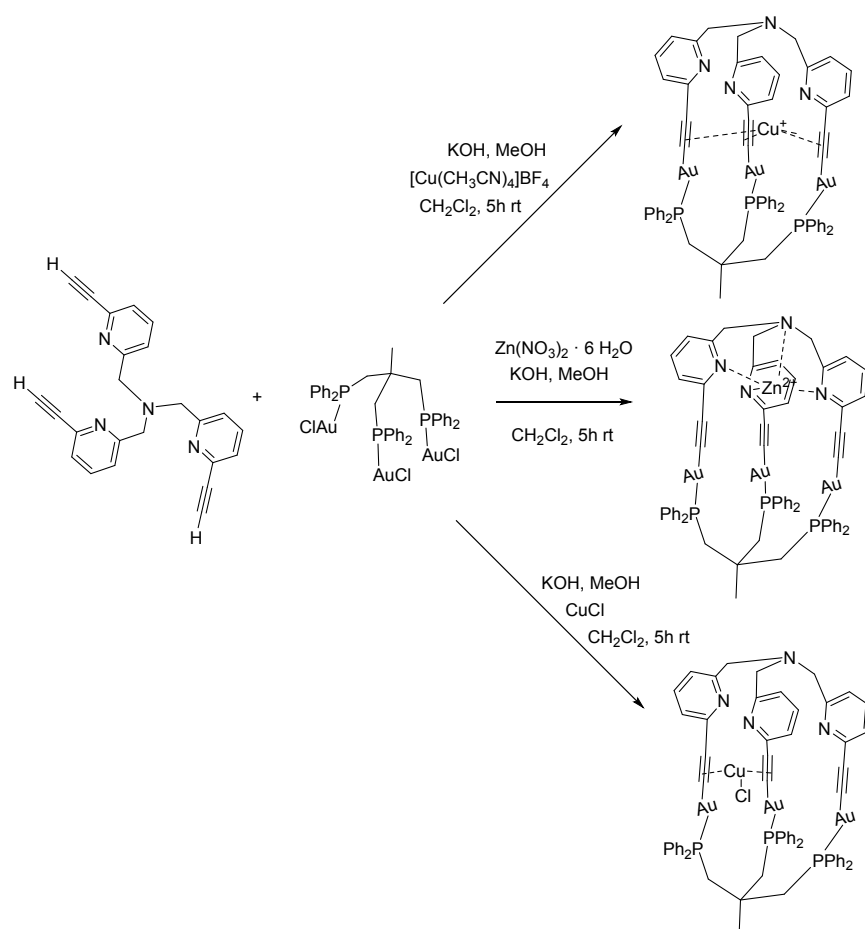

**Scheme S1.** Synthesis of heterometallic complexes **4a-c**.

## Coordinates of the minimised structures

1a

2 1

|   |             |             |             |
|---|-------------|-------------|-------------|
| C | -5.90006500 | -2.05617700 | 3.09849800  |
| C | -5.54209200 | -1.23910900 | 2.03818000  |
| N | -4.29669800 | -1.24888500 | 1.53233200  |
| C | -3.35281800 | -2.08864600 | 2.02617700  |
| C | -6.51003700 | -0.26720400 | 1.39608300  |
| N | -6.15157500 | -0.02006300 | -0.00272700 |
| C | -6.50859500 | -1.10974400 | -0.91453200 |
| C | -6.51737700 | 1.31262700  | -0.48889100 |
| C | -5.54485300 | -1.17623200 | -2.08104000 |
| C | -5.90505800 | -1.68998700 | -3.31648900 |
| C | -4.93818400 | -1.74604600 | -4.32216200 |
| C | -3.66273600 | -1.26242700 | -4.08196400 |
| C | -3.36048200 | -0.73189900 | -2.81990900 |
| N | -4.30073000 | -0.72673100 | -1.84219500 |
| C | -5.55777600 | 2.36090000  | 0.03467400  |
| C | -5.92513400 | 3.68512300  | 0.21196400  |
| C | -4.96224700 | 4.58842400  | 0.66589900  |
| C | -3.68342000 | 4.14528600  | 0.95998500  |
| C | -3.37339300 | 2.78944400  | 0.78328000  |
| N | -4.31018600 | 1.93592000  | 0.29919800  |
| C | -3.65323300 | -2.92114900 | 3.11352600  |
| C | -4.92992800 | -2.89523700 | 3.64992500  |
| C | -2.11239800 | -2.09413400 | 1.35189600  |
| C | -1.07754000 | -2.11958000 | 0.68820600  |
| C | -2.13004300 | 2.21673800  | 1.12929000  |
| C | -1.09263100 | 1.66231100  | 1.48781900  |



|    |             |             |             |
|----|-------------|-------------|-------------|
| C  | -2.12134500 | -0.13926800 | -2.49340000 |
| C  | -1.08712600 | 0.45339600  | -2.19139300 |
| H  | -6.91349500 | -2.04025200 | 3.48541400  |
| H  | -7.54184300 | -0.62675200 | 1.50673500  |
| H  | -6.44798300 | 0.68946000  | 1.92974100  |
| H  | -7.54221800 | -1.03070000 | -1.27718800 |
| H  | -6.44008800 | -2.04969800 | -0.35271000 |
| H  | -6.45214300 | 1.29698900  | -1.58403800 |
| H  | -7.55169700 | 1.58141900  | -0.23573800 |
| H  | -6.91746400 | -2.03833700 | -3.49165000 |
| H  | -5.19205600 | -2.14983800 | -5.29753800 |
| H  | -2.89995800 | -1.26367900 | -4.85126300 |
| H  | -6.94014800 | 4.00559300  | 0.00210100  |
| H  | -2.92369700 | 4.81549200  | 1.34379000  |
| H  | -2.88785700 | -3.58388500 | 3.49906400  |
| H  | -5.18220200 | -3.54141200 | 4.48519400  |
| H  | -5.22194800 | 5.63307000  | 0.80774900  |
| Au | 0.46145500  | 0.63129200  | 2.17993600  |
| Au | 0.47751600  | -2.20363600 | -0.54923500 |
| Au | 0.45959500  | 1.57734600  | -1.64266900 |
| P  | 2.13414600  | -0.63838500 | 3.12601100  |
| P  | 2.11489300  | 3.04708100  | -1.00668600 |
| P  | 2.15614100  | -2.38665800 | -2.11553000 |
| C  | 3.49867900  | -1.35739600 | 2.06968100  |
| H  | 4.05811400  | -0.53837300 | 1.60168700  |
| C  | 1.56847400  | 4.55784700  | -0.05154800 |
| H  | 1.04144300  | 4.23006300  | 0.85195600  |
| C  | 3.26536500  | -3.89180500 | -2.17602600 |
| H  | 2.64670300  | -4.78985900 | -2.28141000 |
| C  | 3.18450300  | 3.91015700  | -2.27552700 |
| H  | 2.54171200  | 4.45186300  | -2.97813900 |

|   |            |             |             |
|---|------------|-------------|-------------|
| H | 3.74109700 | 3.16110800  | -2.84990200 |
| C | 3.47993200 | 2.49994800  | 0.14709000  |
| H | 4.04752800 | 1.69106200  | -0.32851400 |
| H | 3.01933400 | 2.09885600  | 1.05882500  |
| C | 1.63498300 | -2.37090900 | -3.91055700 |
| H | 1.08863800 | -1.44160700 | -4.10902100 |
| H | 0.94638500 | -3.20465600 | -4.08753900 |
| C | 3.49036200 | -1.08242800 | -2.23019500 |
| H | 4.04316500 | -1.05276200 | -1.28342500 |
| H | 3.00695100 | -0.10716000 | -2.36983000 |
| C | 1.60318000 | -2.22302700 | 3.96302300  |
| H | 1.07691200 | -2.84685600 | 3.23131000  |
| H | 0.89434800 | -1.98098900 | 4.76279300  |
| C | 3.20660800 | 0.03893700  | 4.50087700  |
| H | 2.56576600 | 0.37420800  | 5.32382700  |
| H | 3.75553200 | 0.91374000  | 4.13452900  |
| H | 3.03791800 | -1.95191000 | 1.27049700  |
| H | 3.81109900 | -3.97783100 | -1.22959900 |
| H | 0.85733700 | 5.12516800  | -0.66235400 |
| N | 2.74636400 | -2.93308000 | 4.50792600  |
| N | 4.39595400 | -2.18340300 | 2.85747000  |
| N | 4.13706300 | -0.97240500 | 4.97093600  |
| N | 2.78659600 | -2.48012100 | -4.78803500 |
| N | 4.40118400 | -1.35446700 | -3.32754500 |
| N | 4.20029200 | -3.79538000 | -3.28318200 |
| N | 4.10581300 | 4.82866800  | -1.62961200 |
| N | 4.36723200 | 3.60142600  | 0.47445700  |
| N | 2.70400600 | 5.39290500  | 0.29661600  |
| C | 3.40858800 | 5.87996800  | -0.89026700 |
| C | 3.65778500 | 4.68953000  | 1.15089600  |
| H | 4.40265900 | 5.41353100  | 1.49701500  |

|    |             |             |             |
|----|-------------|-------------|-------------|
| H  | 3.13436000  | 4.29215600  | 2.02761700  |
| H  | 2.69836900  | 6.38306300  | -1.55461100 |
| H  | 4.15107300  | 6.61645100  | -0.56625600 |
| C  | 5.04973500  | -1.41379900 | 3.91927200  |
| C  | 3.69757300  | -3.31691500 | 3.46768800  |
| H  | 5.81339700  | -2.05100500 | 4.37688100  |
| H  | 5.55080000  | -0.54351300 | 3.48204400  |
| H  | 4.44935600  | -3.97236700 | 3.91935100  |
| H  | 3.17421100  | -3.88293600 | 2.68909200  |
| C  | 3.71053600  | -1.36112900 | -4.61896700 |
| C  | 5.08477800  | -2.63953900 | -3.15921900 |
| H  | 4.46871300  | -1.42424600 | -5.40636000 |
| H  | 3.16557200  | -0.41891800 | -4.74417100 |
| H  | 5.85510900  | -2.71621200 | -3.93338100 |
| H  | 5.58070200  | -2.66270900 | -2.18290100 |
| Zn | -3.98286000 | -0.01135900 | -0.00429500 |
| C  | 3.45050000  | -2.14182800 | 5.51786700  |
| H  | 2.74189900  | -1.82115900 | 6.28852100  |
| H  | 4.19973400  | -2.78456600 | 5.99135500  |
| C  | 3.51936100  | -3.72908500 | -4.57548700 |
| H  | 4.27544600  | -3.81739100 | -5.36237200 |
| H  | 2.83125700  | -4.57563300 | -4.66885900 |
| C  | 5.02070000  | 4.14388400  | -0.71974000 |
| H  | 5.77752200  | 4.86416700  | -0.39261300 |
| H  | 5.52999000  | 3.33514600  | -1.25469600 |

**1c**

1 1

|   |             |             |             |
|---|-------------|-------------|-------------|
| C | -4.41874600 | -3.62660300 | -3.19774100 |
| C | -4.38326300 | -3.10602500 | -1.89937800 |

|   |             |             |             |
|---|-------------|-------------|-------------|
| N | -3.43315100 | -2.26055500 | -1.50547400 |
| C | -2.50223000 | -1.88354400 | -2.38870900 |
| C | -5.42834100 | -3.52093300 | -0.87875100 |
| N | -6.01366500 | -2.44106800 | -0.13431300 |
| C | -6.64392500 | -1.35071200 | -0.81734400 |
| C | -6.32263600 | -2.64093900 | 1.25566600  |
| C | -6.23459700 | 0.02134900  | -0.30003400 |
| C | -7.18092700 | 1.03118300  | -0.10087700 |
| C | -6.75359200 | 2.27262100  | 0.35991900  |
| C | -5.40590100 | 2.46979600  | 0.62893800  |
| C | -4.53389700 | 1.39544500  | 0.40891600  |
| N | -4.93966100 | 0.20825700  | -0.05849400 |
| C | -5.24313600 | -2.10609100 | 2.18525300  |
| C | -5.52741100 | -1.46537400 | 3.39422100  |
| C | -4.47336000 | -0.93615100 | 4.13221400  |
| C | -3.17964800 | -1.02752100 | 3.63225100  |
| C | -2.99970300 | -1.69785800 | 2.41771000  |
| N | -4.00421400 | -2.25574300 | 1.73566000  |
| C | -2.44150900 | -2.37020300 | -3.70115100 |
| C | -3.42507300 | -3.26360000 | -4.10153800 |
| C | -1.58680400 | -0.87237800 | -1.92798900 |
| C | -0.83885000 | 0.11410000  | -1.81017600 |
| C | -1.72946000 | -1.76889000 | 1.74197300  |
| C | -0.67593900 | -2.02801100 | 1.13562000  |
| C | -3.13528800 | 1.48425800  | 0.70578100  |
| C | -1.93448000 | 1.47557200  | 0.97715100  |
| H | -5.21634700 | -4.30300500 | -3.49104500 |
| H | -6.17905900 | -4.14495100 | -1.40168200 |
| H | -4.92195600 | -4.17185800 | -0.15794300 |
| H | -7.74831700 | -1.41206900 | -0.79338200 |
| H | -6.35732100 | -1.40215600 | -1.87505600 |

|    |             |             |             |
|----|-------------|-------------|-------------|
| H  | -7.27967700 | -2.16041600 | 1.50135700  |
| H  | -6.46790200 | -3.71165000 | 1.46137500  |
| H  | -8.23213900 | 0.84261500  | -0.29927500 |
| H  | -7.46738200 | 3.07527200  | 0.52149500  |
| H  | -5.03201900 | 3.41441600  | 1.00886100  |
| H  | -6.55329600 | -1.36445300 | 3.73739100  |
| H  | -2.33520400 | -0.58504700 | 4.14948100  |
| H  | -1.66197100 | -2.03418000 | -4.37634300 |
| H  | -3.42923700 | -3.65961200 | -5.11300800 |
| H  | -4.66154100 | -0.42798300 | 5.07359800  |
| Au | 0.96110600  | -2.72997100 | 0.23957000  |
| Au | 0.05293700  | 1.89618200  | -1.71636600 |
| Au | -0.03094700 | 1.46539000  | 1.59347400  |
| P  | 2.81084700  | -3.58224600 | -0.81342400 |
| P  | 2.08234900  | 1.11728700  | 2.40014300  |
| P  | 0.85033800  | 4.03984100  | -1.69260700 |
| C  | 3.36168700  | -2.84544700 | -2.43920200 |
| H  | 3.57491400  | -1.78021400 | -2.29467500 |
| C  | 2.18749900  | -0.02832700 | 3.87003900  |
| H  | 1.64821700  | -0.95134900 | 3.62800700  |
| C  | 1.54174100  | 4.81788200  | -3.24285300 |
| H  | 0.78908300  | 4.75829200  | -4.03688300 |
| C  | 3.29170100  | 2.41272600  | 2.99152600  |
| H  | 2.84168900  | 2.98336400  | 3.81163100  |
| H  | 3.50070900  | 3.11682400  | 2.17799000  |
| C  | 3.23912400  | 0.18716400  | 1.27386000  |
| H  | 3.43714100  | 0.79353200  | 0.38187900  |
| H  | 2.72380900  | -0.72444200 | 0.94331400  |
| C  | -0.37752300 | 5.37735200  | -1.25630200 |
| H  | -0.78659000 | 5.16946300  | -0.26097400 |
| H  | -1.21178800 | 5.33877400  | -1.96541600 |

|   |            |             |             |
|---|------------|-------------|-------------|
| C | 2.20721500 | 4.56010400  | -0.51988800 |
| H | 3.10969800 | 3.97391300  | -0.73195200 |
| H | 1.88804100 | 4.32682000  | 0.50350400  |
| C | 2.81587400 | -5.37732100 | -1.32929700 |
| H | 1.97139900 | -5.55748400 | -2.00378100 |
| H | 2.66565800 | -6.00453200 | -0.44348800 |
| C | 4.46772200 | -3.55896700 | 0.05176900  |
| H | 4.38384200 | -4.11895800 | 0.99062200  |
| H | 4.73282600 | -2.52505600 | 0.30725900  |
| H | 2.54004700 | -2.91796100 | -3.16041800 |
| H | 2.41400100 | 4.24482100  | -3.57696700 |
| H | 1.68104000 | 0.43432100  | 4.72434400  |
| N | 4.06516500 | -5.72871000 | -1.98555600 |
| N | 4.54056000 | -3.52605700 | -2.95143300 |
| N | 5.50314800 | -4.14857000 | -0.78307300 |
| N | 0.24347600 | 6.69228300  | -1.28407000 |
| N | 2.49948400 | 5.97952600  | -0.63861900 |
| N | 1.91431200 | 6.20491000  | -3.01003500 |
| N | 4.53066900 | 1.79307100  | 3.43939800  |
| N | 4.49021100 | -0.14907500 | 1.93918500  |
| N | 3.57055400 | -0.32380600 | 4.20921300  |
| C | 4.31271100 | 0.88361000  | 4.56458400  |
| C | 4.26476000 | -0.99578800 | 3.11574900  |
| H | 5.24252900 | -1.32484000 | 3.48425300  |
| H | 3.69230200 | -1.88122500 | 2.81750100  |
| H | 3.78324900 | 1.41401600  | 5.36293400  |
| H | 5.29280500 | 0.58085700  | 4.94866000  |
| C | 5.67492900 | -3.41332400 | -2.03533700 |
| C | 4.28288400 | -4.94468500 | -3.20011500 |
| H | 6.55973500 | -3.81265000 | -2.54280300 |
| H | 5.85727000 | -2.35646000 | -1.81227900 |

|    |             |             |             |
|----|-------------|-------------|-------------|
| H  | 5.15306800  | -5.36016900 | -3.71961700 |
| H  | 3.41310500  | -5.04530400 | -3.85801400 |
| C  | 1.33089000  | 6.80060900  | -0.31505100 |
| C  | 2.95047700  | 6.32751400  | -1.98751800 |
| H  | 1.65391500  | 7.84668500  | -0.28213600 |
| H  | 0.95969200  | 6.52667400  | 0.67855800  |
| H  | 3.28871700  | 7.36911300  | -1.97071800 |
| H  | 3.80431200  | 5.69680300  | -2.25836900 |
| Cu | -1.51022800 | -0.46094800 | 0.10137400  |
| C  | 5.21503500  | -5.54722300 | -1.10139700 |
| H  | 5.05043600  | -6.10420100 | -0.17282800 |
| H  | 6.09490500  | -5.96823800 | -1.59972600 |
| C  | 0.76631000  | 7.01866900  | -2.61027800 |
| H  | 1.08217000  | 8.06741600  | -2.60152600 |
| H  | -0.03175800 | 6.90928600  | -3.35206200 |
| C  | 5.20215700  | 1.05749000  | 2.37048700  |
| H  | 6.18910400  | 0.75558700  | 2.73723200  |
| H  | 5.34611400  | 1.71898100  | 1.50909200  |

**1b**

0 1

|   |            |            |             |
|---|------------|------------|-------------|
| C | 7.33762300 | 1.97893600 | 1.97178100  |
| C | 6.07142200 | 2.36948100 | 1.51708100  |
| N | 5.01619500 | 1.56652100 | 1.55729700  |
| C | 5.16749800 | 0.32095200 | 2.04605800  |
| C | 5.90747700 | 3.75614600 | 0.91721000  |
| N | 4.54978900 | 4.18475100 | 0.69529800  |
| C | 3.83309800 | 4.37366800 | 1.94419700  |
| C | 4.43686900 | 5.27572900 | -0.25108800 |
| C | 2.35551600 | 4.67506800 | 1.81959700  |

|   |             |             |             |
|---|-------------|-------------|-------------|
| C | 1.85168800  | 5.88158500  | 2.31147300  |
| C | 0.48458200  | 6.12720600  | 2.22806200  |
| C | -0.32848200 | 5.17525100  | 1.63857000  |
| C | 0.26405000  | 3.99014800  | 1.16718100  |
| N | 1.57134900  | 3.73946400  | 1.27619700  |
| C | 3.14853500  | 5.22168900  | -1.05347900 |
| C | 2.43117800  | 6.37411600  | -1.38419900 |
| C | 1.22998800  | 6.23186800  | -2.07233700 |
| C | 0.75591900  | 4.95615100  | -2.35120700 |
| C | 1.54565200  | 3.86485800  | -1.97230700 |
| N | 2.74118300  | 4.00508600  | -1.39105100 |
| C | 6.40262600  | -0.16153700 | 2.50120500  |
| C | 7.49943800  | 0.68985500  | 2.46108000  |
| C | 3.99761000  | -0.49853400 | 2.08513600  |
| C | 2.96537700  | -1.15985500 | 2.11141400  |
| C | 1.09897100  | 2.49437900  | -2.06418100 |
| C | 1.23268800  | 1.25634300  | -2.16091300 |
| C | -0.59971600 | 3.01532400  | 0.53989600  |
| C | -1.71311200 | 2.51656000  | 0.25851300  |
| H | 8.17221600  | 2.67423900  | 1.93656100  |
| H | 6.49021300  | 4.46440900  | 1.54619800  |
| H | 6.41376300  | 3.73733300  | -0.05653200 |
| H | 4.29466400  | 5.18112100  | 2.55029800  |
| H | 3.92321400  | 3.43809000  | 2.50464100  |
| H | 4.53248100  | 6.27360000  | 0.22070000  |
| H | 5.27186600  | 5.19334800  | -0.95809800 |
| H | 2.52472000  | 6.61209500  | 2.75060200  |
| H | 0.06357200  | 7.05436200  | 2.60754100  |
| H | -1.39764700 | 5.32039600  | 1.52974100  |
| H | 2.79375500  | 7.35437100  | -1.08701500 |
| H | -0.20677400 | 4.79534100  | -2.82504200 |



|    |             |             |             |
|----|-------------|-------------|-------------|
| H  | 6.47987600  | -1.17395900 | 2.88270300  |
| H  | 8.46988200  | 0.35194100  | 2.81477400  |
| H  | 0.64756200  | 7.10627200  | -2.34972300 |
| Au | 1.90613000  | -0.61764900 | -2.12054300 |
| Au | 1.15950200  | -1.97048600 | 2.06172300  |
| Au | -3.53646500 | 1.77253500  | -0.05570700 |
| P  | 2.95689900  | -2.62866100 | -1.95603600 |
| P  | -5.62031100 | 0.91142600  | -0.36506000 |
| P  | -0.95961800 | -2.82551000 | 1.89348700  |
| C  | 3.53389500  | -3.51334300 | -3.49367800 |
| H  | 4.19144800  | -2.84634900 | -4.06278500 |
| C  | -5.89425300 | -0.30219500 | -1.75305400 |
| H  | -5.19668300 | -1.13829000 | -1.63704800 |
| C  | -1.58764100 | -4.09140100 | 3.11225400  |
| H  | -1.57099100 | -3.66152100 | 4.12034000  |
| C  | -7.08427600 | 2.01501500  | -0.70883000 |
| H  | -6.89141100 | 2.59596400  | -1.61786600 |
| H  | -7.19458300 | 2.72852000  | 0.11576100  |
| C  | -6.37944500 | -0.08874500 | 1.01278600  |
| H  | -6.46951700 | 0.54898500  | 1.89994600  |
| H  | -5.69863700 | -0.91038900 | 1.27297300  |
| C  | -2.42891500 | -1.68118000 | 1.93589200  |
| H  | -2.29594000 | -0.94626200 | 1.13386000  |
| H  | -2.44867700 | -1.15150000 | 2.89471900  |
| C  | -1.38492300 | -3.74544400 | 0.32940500  |
| H  | -0.70018300 | -4.59340400 | 0.21292300  |
| H  | -1.23750000 | -3.05464500 | -0.50912800 |
| C  | 2.14366100  | -4.08651900 | -1.12734700 |
| H  | 1.21740800  | -4.32949800 | -1.66105600 |
| H  | 1.87428400  | -3.79025400 | -0.10584000 |
| C  | 4.56551500  | -2.67023600 | -1.01631100 |

|   |             |             |             |
|---|-------------|-------------|-------------|
| H | 4.37867500  | -2.32041000 | 0.00592400  |
| H | 5.26509900  | -1.96532600 | -1.47926200 |
| H | 2.66830700  | -3.73511200 | -4.12845900 |
| H | -0.91631000 | -4.95779100 | 3.11714000  |
| H | -5.65149400 | 0.18399700  | -2.70439700 |
| N | 3.02188400  | -5.25042700 | -1.09595600 |
| N | 4.24081000  | -4.74805600 | -3.16954300 |
| N | 5.13982600  | -4.01167900 | -1.00610300 |
| N | -3.67948800 | -2.41821500 | 1.74621000  |
| N | -2.76270100 | -4.22177100 | 0.35166900  |
| N | -2.94341400 | -4.52144000 | 2.78111200  |
| N | -8.31172000 | 1.24232900  | -0.86498700 |
| N | -7.69380100 | -0.59985300 | 0.63782900  |
| N | -7.26964500 | -0.78644100 | -1.77466200 |
| C | -8.21930900 | 0.30415000  | -1.98348900 |
| C | -7.62033500 | -1.47297500 | -0.53242300 |
| H | -8.60445200 | -1.93612200 | -0.67021600 |
| H | -6.89087200 | -2.26781800 | -0.34312900 |
| H | -7.94541400 | 0.85156200  | -2.89205200 |
| H | -9.21178800 | -0.13580900 | -2.13545400 |
| C | 5.42849900  | -4.48909500 | -2.35482900 |
| C | 3.38405100  | -5.68423500 | -2.44389900 |
| H | 5.98717300  | -5.42882700 | -2.27009600 |
| H | 6.06361300  | -3.75852400 | -2.86792300 |
| H | 3.92301700  | -6.63520800 | -2.35842200 |
| H | 2.47068800  | -5.85962200 | -3.02363500 |
| C | -3.69932500 | -3.10666400 | 0.45057100  |
| C | -3.00297500 | -5.14197000 | 1.45803400  |
| H | -4.71108800 | -3.50384100 | 0.29675400  |
| H | -3.46783900 | -2.38130400 | -0.33673800 |
| H | -4.00539200 | -5.56885500 | 1.33340900  |

|    |             |             |             |
|----|-------------|-------------|-------------|
| H  | -2.27535000 | -5.95999100 | 1.41144100  |
| Cu | -0.31720500 | 1.64158200  | -0.91518700 |
| C  | 4.25244000  | -4.97040100 | -0.35259500 |
| H  | 3.99378900  | -4.59829200 | 0.64434500  |
| H  | 4.79756700  | -5.91512400 | -0.23983700 |
| C  | -3.88758300 | -3.40659600 | 2.80450100  |
| H  | -4.89659700 | -3.82047200 | 2.68904200  |
| H  | -3.83180800 | -2.90656900 | 3.77783700  |
| C  | -8.62920400 | 0.48397500  | 0.34467600  |
| H  | -9.62533800 | 0.04537700  | 0.21358600  |
| H  | -8.66685500 | 1.16839400  | 1.19938900  |
| Cl | -1.45292000 | -0.42282100 | -1.22981200 |

**1**

0 1

|   |            |             |             |
|---|------------|-------------|-------------|
| C | 5.35041500 | -3.08587700 | -2.27890500 |
| C | 4.94134100 | -2.11369500 | -1.35561300 |
| N | 3.83307800 | -2.23478900 | -0.63722800 |
| C | 3.05135300 | -3.31341900 | -0.82684400 |
| C | 5.75791700 | -0.84430800 | -1.19750700 |
| N | 5.41935000 | -0.04945000 | -0.04782100 |
| C | 5.78415800 | -0.64860400 | 1.20761800  |
| C | 5.78748800 | 1.33580300  | -0.16439100 |
| C | 4.99376300 | -0.14922400 | 2.40319700  |
| C | 5.42827900 | -0.46562100 | 3.69778100  |
| C | 4.65094500 | -0.06805100 | 4.77682300  |
| C | 3.47214900 | 0.63122000  | 4.54385000  |
| C | 3.12487700 | 0.91652000  | 3.21732700  |
| N | 3.88353100 | 0.53849500  | 2.17233300  |
| C | 4.97779200 | 2.12600500  | -1.17600200 |

|    |             |             |             |
|----|-------------|-------------|-------------|
| C  | 5.40892800  | 3.40449500  | -1.55635700 |
| C  | 4.61518200  | 4.14482300  | -2.42147000 |
| C  | 3.42353500  | 3.59901400  | -2.88522600 |
| C  | 3.08035900  | 2.30835800  | -2.46358000 |
| N  | 3.85515500  | 1.58752200  | -1.63243800 |
| C  | 3.37248800  | -4.32718900 | -1.73826900 |
| C  | 4.54940600  | -4.20361400 | -2.46796900 |
| C  | 1.85497600  | -3.34307300 | -0.04311200 |
| C  | 0.85959700  | -3.23568200 | 0.66598600  |
| C  | 1.86793900  | 1.66876600  | -2.87264300 |
| C  | 0.85729800  | 1.02126800  | -3.12664600 |
| C  | 1.92493700  | 1.61669000  | 2.87634100  |
| C  | 0.92393700  | 2.18250100  | 2.44854400  |
| H  | 6.27501900  | -2.95875400 | -2.83570200 |
| H  | 6.83627700  | -1.10874900 | -1.24276400 |
| H  | 5.55378800  | -0.23636400 | -2.08676300 |
| H  | 6.86776200  | -0.55719700 | 1.43596600  |
| H  | 5.57669500  | -1.72238300 | 1.13025300  |
| H  | 5.60339400  | 1.80604200  | 0.80882600  |
| H  | 6.86730700  | 1.48342900  | -0.38117800 |
| H  | 6.35387700  | -1.01534500 | 3.84661200  |
| H  | 4.95929200  | -0.30012100 | 5.79280900  |
| H  | 2.83429900  | 0.96072000  | 5.35750300  |
| H  | 6.34462600  | 3.80398600  | -1.17432000 |
| H  | 2.77264600  | 4.14272800  | -3.56210500 |
| H  | 2.71654300  | -5.18370700 | -1.85466600 |
| H  | 4.83793100  | -4.97406900 | -3.17811700 |
| H  | 4.92059900  | 5.14007900  | -2.73347400 |
| Au | -0.45252000 | -0.46375600 | -3.12035000 |
| Au | -0.42196700 | -2.48058700 | 1.97304400  |
| Au | -0.37514200 | 2.94867400  | 1.16542300  |

|   |             |             |             |
|---|-------------|-------------|-------------|
| P | -1.73482500 | -2.33598500 | -2.84931400 |
| P | -1.65099800 | 3.67942400  | -0.58456700 |
| P | -1.67146000 | -1.29691200 | 3.47704600  |
| C | -2.74240500 | -2.48322200 | -1.28665200 |
| H | -3.47374000 | -1.66672500 | -1.25307300 |
| C | -0.74433700 | 4.35648900  | -2.06760700 |
| H | -0.04093000 | 3.59024000  | -2.41558400 |
| C | -2.98596000 | -2.06095400 | 4.55842300  |
| H | -2.53576900 | -2.85273400 | 5.16809300  |
| C | -2.94508100 | 5.01468000  | -0.43095800 |
| H | -2.47482500 | 5.93014600  | -0.05402800 |
| H | -3.69547800 | 4.70696900  | 0.30653200  |
| C | -2.69242900 | 2.42306500  | -1.48794000 |
| H | -3.42906100 | 2.00152100  | -0.79349300 |
| H | -2.03643300 | 1.60869800  | -1.81954700 |
| C | -0.74521400 | -0.36573500 | 4.80123800  |
| H | -0.02504500 | 0.29948100  | 4.30956000  |
| H | -0.18332000 | -1.07806000 | 5.41589200  |
| C | -2.67837600 | 0.13389300  | 2.83082400  |
| H | -3.42324300 | -0.24388000 | 2.12013100  |
| H | -2.00578400 | 0.80939400  | 2.28789000  |
| C | -0.83553400 | -3.96464000 | -2.71446300 |
| H | -0.11278100 | -3.88748500 | -1.89311600 |
| H | -0.27776900 | -4.14505800 | -3.64035000 |
| C | -3.05960900 | -2.86220600 | -4.05304100 |
| H | -2.61227900 | -2.99683200 | -5.04454100 |
| H | -3.80708200 | -2.06497400 | -4.13886200 |
| H | -2.06648500 | -2.36665600 | -0.43046300 |
| H | -3.74640300 | -2.53126500 | 3.92421200  |
| H | -0.16461900 | 5.23561700  | -1.76436800 |
| N | -1.76370400 | -5.06100300 | -2.46549400 |

|   |             |             |             |
|---|-------------|-------------|-------------|
| N | -3.42721100 | -3.76790700 | -1.20812400 |
| N | -3.70208900 | -4.10077200 | -3.62758700 |
| N | -1.65550900 | 0.40916000  | 5.63605000  |
| N | -3.34185500 | 0.85496900  | 3.91041600  |
| N | -3.60828400 | -1.06414400 | 5.42266600  |
| N | -3.58904100 | 5.28045200  | -1.71255800 |
| N | -3.37103400 | 3.01300400  | -2.63559400 |
| N | -1.67122100 | 4.71004300  | -3.13588300 |
| C | -2.62396200 | 5.73169400  | -2.71692700 |
| C | -2.41063800 | 3.54110700  | -3.60907300 |
| H | -2.96905300 | 3.83305500  | -4.50615900 |
| H | -1.70085700 | 2.75273800  | -3.87981700 |
| H | -2.07805800 | 6.59771300  | -2.32605800 |
| H | -3.18780800 | 6.05315000  | -3.60054700 |
| C | -4.35040400 | -3.95326900 | -2.32466900 |
| C | -2.47371300 | -4.88125200 | -1.20015200 |
| H | -4.93068300 | -4.86393200 | -2.13520200 |
| H | -5.04554500 | -3.10664400 | -2.36355600 |
| H | -3.03363400 | -5.80041300 | -0.99173200 |
| H | -1.74462600 | -4.72625200 | -0.39828600 |
| C | -2.36978100 | 1.41636400  | 4.85317500  |
| C | -4.26043500 | -0.00866400 | 4.64766900  |
| H | -2.91446200 | 2.06412500  | 5.54999900  |
| H | -1.64437400 | 2.02508800  | 4.30377100  |
| H | -4.82563000 | 0.61854800  | 5.34701800  |
| H | -4.96961800 | -0.46419200 | 3.94690300  |
| C | -2.74201200 | -5.20257700 | -3.53794800 |
| H | -2.21829500 | -5.30072300 | -4.49548900 |
| H | -3.30817700 | -6.12475600 | -3.36168700 |
| C | -2.62988700 | -0.43809900 | 6.31404900  |
| H | -3.18061500 | 0.18344300  | 7.02989500  |

|   |             |             |             |
|---|-------------|-------------|-------------|
| H | -2.10339500 | -1.21925600 | 6.87388200  |
| C | -4.26750800 | 4.09339500  | -2.23256100 |
| H | -4.84607700 | 4.39786000  | -3.11260400 |
| H | -4.96698000 | 3.71959400  | -1.47592100 |
